# Supplementary material for: Epigenetic Manipulation Induced Production of Immunosuppressive Chromones and Cytochalasins from the Mangrove Endophytic Fungus Phomopsis asparagi DHS-48
Source: MDPI journal article supplement (doi:10.3390/md20100616), 2022-09-29
Supplement: s1 [file s1]

# Epigenetic Manipulation Induced Production of Immunosuppressive Chromones and Cytochalasins from the Mangrove Endophytic Fungus *Phomopsis asparagi* DHS-48

Ting Feng,<sup>†</sup> Chengwen Wei,<sup>†</sup> Xiaolin Deng, Dandan Chen, and Jing Xu<sup>\*</sup>

Collaborative Innovation Center of Ecological Civilization, School of Chemical Engineering and Technology, Hainan University, Haikou 570228, P. R. China.

<sup>†</sup> These authors have contributed equally to this work.

<sup>\*</sup> To whom correspondence should be addressed.

Prof. Dr. Jing Xu, Tel.: ++86-898-6627-9226, Fax: ++86-898-6627-9010, E-mail: happyjing3@163.com

# Contents

|                                                                            |    |
|----------------------------------------------------------------------------|----|
| Figure S1. <sup>1</sup> H-NMR of phaseolorin J (1) -----                   | 4  |
| Figure S2. <sup>13</sup> C-NMR of phaseolorin J (1)-----                   | 4  |
| Figure S3. DEPT of phaseolorin J (1)-----                                  | 5  |
| Figure S4. <sup>1</sup> H- <sup>1</sup> H COSY of phaseolorin J (1) -----  | 5  |
| Figure S5. HSQC of phaseolorin J (1) -----                                 | 6  |
| Figure S6. HMBC of phaseolorin J (1)-----                                  | 6  |
| Figure S7. NOSEY of phaseolorin J (1)-----                                 | 7  |
| Figure S8. HR-ESI-MS of phaseolorin J (1)-----                             | 7  |
| Figure S9. <sup>1</sup> H-NMR of phomoparagin D (5)-----                   | 8  |
| Figure S10. <sup>13</sup> C-NMR of phomoparagin D (5)-----                 | 8  |
| Figure S11. DEPT of phomoparagin D (5) -----                               | 9  |
| Figure S12. <sup>1</sup> H- <sup>1</sup> H COSY of phomoparagin D (5)----- | 9  |
| Figure S13. HSQC of phomoparagin D (5) -----                               | 10 |
| Figure S14. HMBC of phomoparagin D (5)-----                                | 10 |
| Figure S15. NOSEY of phomoparagin D (5)-----                               | 11 |
| Figure S16. HR-ESI-MS of phomoparagin D (5)-----                           | 11 |
| Figure S17. <sup>1</sup> H-NMR of phaseolorin D (2) -----                  | 12 |
| Figure S18. <sup>13</sup> C-NMR of phaseolorin D (2)-----                  | 12 |
| Figure S19. HR-ESI-MS of phaseolorin D (2)-----                            | 13 |
| Figure S20. <sup>1</sup> H-NMR of chaetochromone B (3)-----                | 13 |
| Figure S21. <sup>13</sup> C-NMR of chaetochromone B (3) -----              | 14 |
| Figure S22. HR-ESI-MS of chaetochromone B (3) -----                        | 14 |
| Figure S23. <sup>1</sup> H-NMR of pleosporalin D (4) -----                 | 15 |
| Figure S24. <sup>13</sup> C-NMR of pleosporalin D (4)-----                 | 15 |
| Figure S25. HR-ESI-MS of pleosporalin D (4)-----                           | 16 |
| Figure S26. <sup>1</sup> H-NMR of cytochalasin J (6) -----                 | 16 |
| Figure S27. <sup>13</sup> C-NMR of cytochalasin J (6) -----                | 17 |
| Figure S28. HR-ESI-MS of cytochalasin J (6) -----                          | 17 |
| Figure S29. <sup>1</sup> H-NMR of cytochalasin J <sub>1</sub> (7) -----    | 18 |
| Figure S30. <sup>13</sup> C-NMR of cytochalasin J <sub>1</sub> (7) -----   | 18 |
| Figure S31. HR-ESI-MS of cytochalasin J <sub>1</sub> (7) -----             | 19 |
| Figure S32. <sup>1</sup> H-NMR of cytochalasin H (8) -----                 | 19 |
| Figure S33. <sup>13</sup> C-NMR of cytochalasin H (8)-----                 | 20 |
| Figure S34. HR-ESI-MS of cytochalasin H (8)-----                           | 20 |
| Figure S35. <sup>1</sup> H-NMR of cytochalasin J <sub>2</sub> (9)-----     | 21 |

|                                                                                                                                                                         |    |
|-------------------------------------------------------------------------------------------------------------------------------------------------------------------------|----|
| <b>Figure S36.</b> $^{13}\text{C}$ -NMR of cytochalasin J <sub>2</sub> ( <b>9</b> ) -----                                                                               | 21 |
| <b>Figure S37.</b> HR-ESI-MS of cytochalasin J <sub>2</sub> ( <b>9</b> ) -----                                                                                          | 22 |
| <b>Figure S38.</b> $^1\text{H}$ -NMR of cytochalasin J <sub>3</sub> ( <b>10</b> )-----                                                                                  | 22 |
| <b>Figure S39.</b> $^{13}\text{C}$ -NMR of cytochalasin J <sub>3</sub> ( <b>10</b> )-----                                                                               | 23 |
| <b>Figure S40.</b> HR-ESI-MS of cytochalasin J <sub>3</sub> ( <b>10</b> )-----                                                                                          | 23 |
| <b>Figure S41.</b> $^1\text{H}$ -NMR of phomopchalasin D ( <b>11</b> )-----                                                                                             | 24 |
| <b>Figure S42.</b> $^{13}\text{C}$ -NMR of phomopchalasin D ( <b>11</b> )-----                                                                                          | 24 |
| <b>Figure S43.</b> HR-ESI-MS of phomopchalasin D ( <b>11</b> )-----                                                                                                     | 25 |
| <b>Figure S44.</b> Overlay of HPLC profiles of EtOAc extracts of <i>Phomopsis asparagi</i> DHS-48<br>cultivated in PDA treated with different epigenetic agents. -----  | 26 |
| <b>Figure S45.</b> HPLC spectrum for the purity of tested compounds-----                                                                                                | 27 |
| <b>Table S1.</b> Gibbs free energies <sup>a</sup> and equilibrium populations <sup>b</sup> of low-energy conformers of<br>phaseolorin J ( <b>1</b> )-----               | 33 |
| <b>Table S2.</b> Cartesian coordinates for the low-energy reoptimized MMFF conformers of<br>phaseolorin J ( <b>1</b> ) at B3LYP/6-31G(d,p) level of theory in gas-----  | 33 |
| <b>Table S3.</b> Gibbs free energies <sup>a</sup> and equilibrium populations <sup>b</sup> of low-energy conformers of<br>phomoparagin D ( <b>5</b> )-----              | 36 |
| <b>Table S4.</b> Cartesian coordinates for the low-energy reoptimized MMFF conformers of<br>phomoparagin D ( <b>5</b> ) at B3LYP/6-31G(d,p) level of theory in gas----- | 36 |
| <b>Table S5.</b> The calculated $^{13}\text{C}$ NMR data for isomers of phaseolorin J ( <b>1</b> ) -----                                                                | 43 |
| <b>Table S6.</b> DFT-optimized structures and thermodynamic parameters for low-energy<br>conformers of <b>1</b> -----                                                   | 44 |
| <b>Table S7.</b> DFT-optimized structures and thermodynamic parameters for low-energy<br>conformers of 8- <i>epi</i> - <b>1</b> -----                                   | 45 |
| <b>Table S8.</b> Optimized Z-matrixes of <b>1</b> in the gas phase (Å) at B3LYP/6-31G(d) level-----                                                                     | 46 |
| <b>Table S9.</b> Optimized Z-matrixes of 8- <i>epi</i> - <b>1</b> in the gas phase (Å) at B3LYP/6-31G(d) level-----                                                     | 47 |

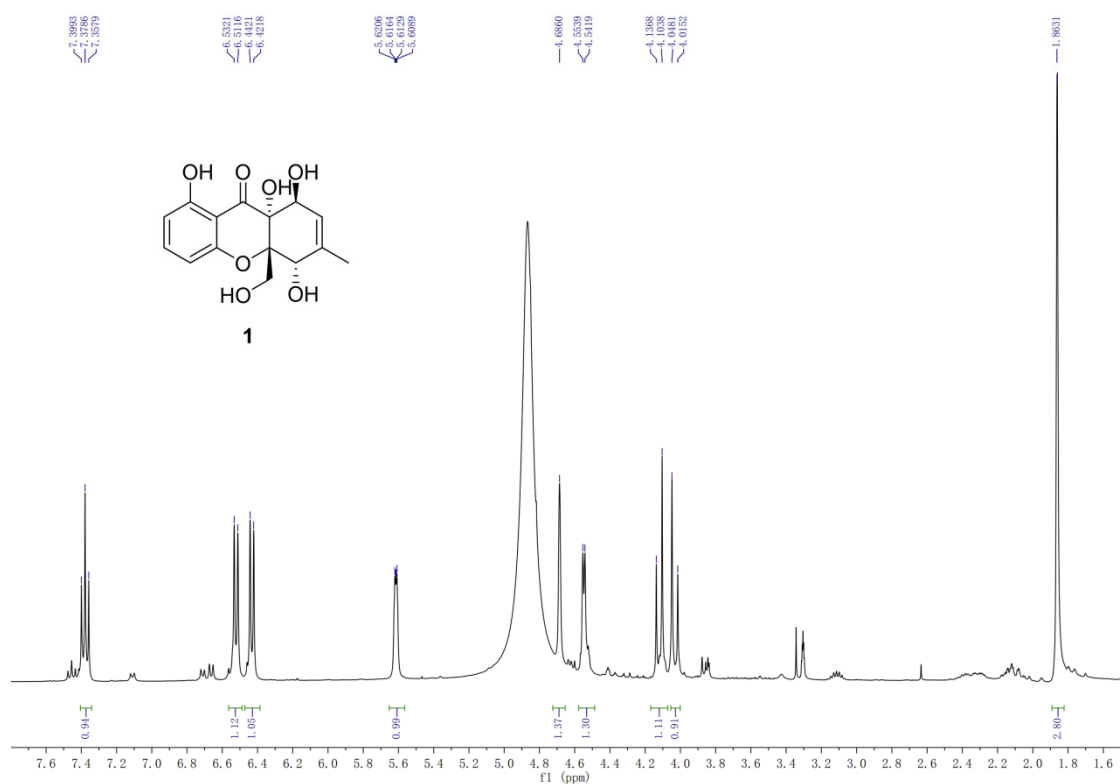

Figure S1. <sup>1</sup>H-NMR of phaseolorin J (1).

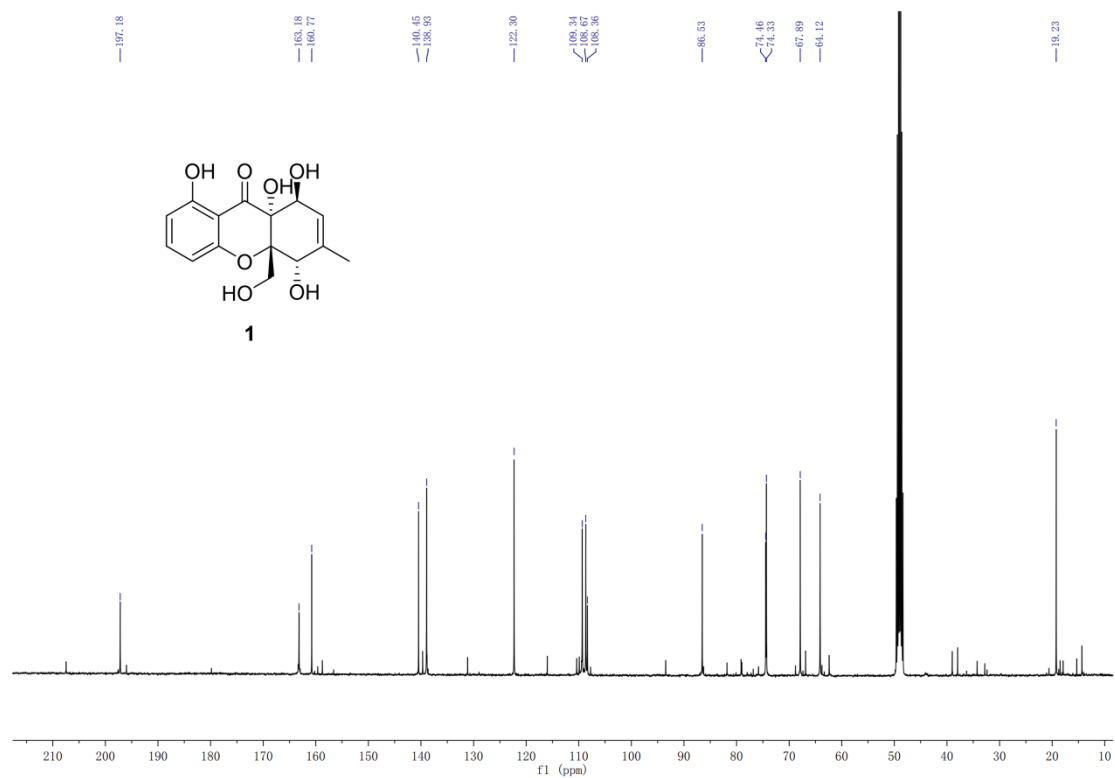

Figure S2. <sup>13</sup>C-NMR of phaseolorin J (1).

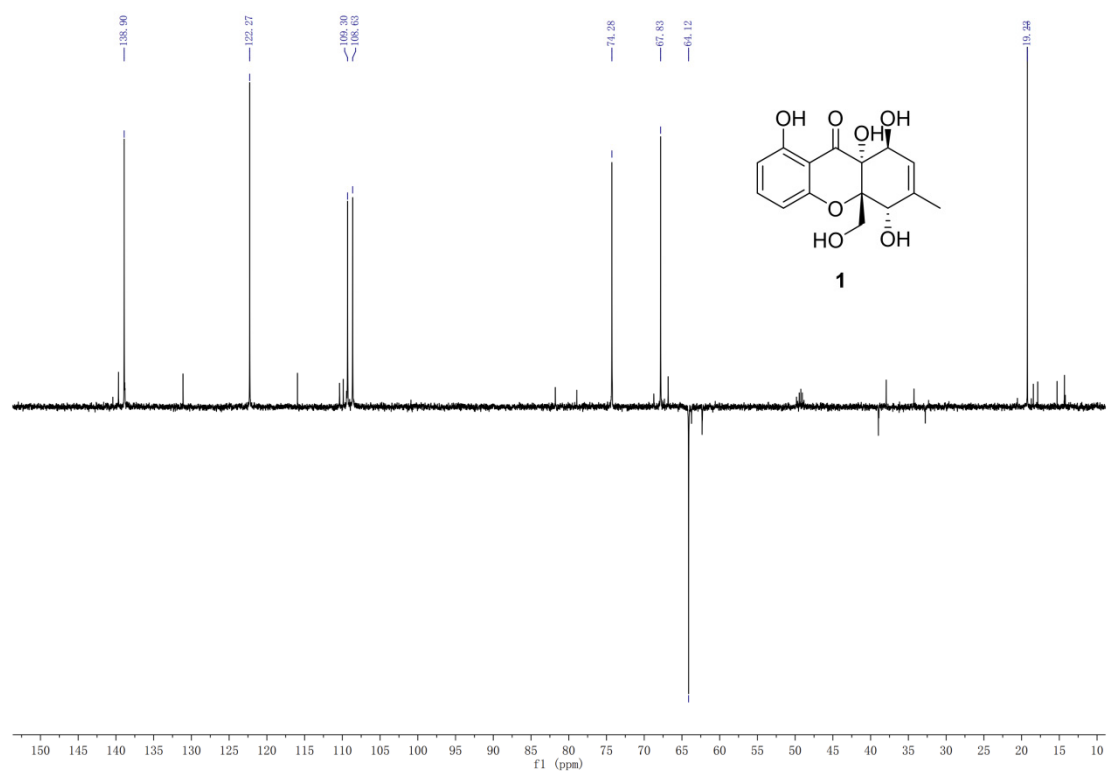

Figure S3. DEPT of phaseolorin J (1).

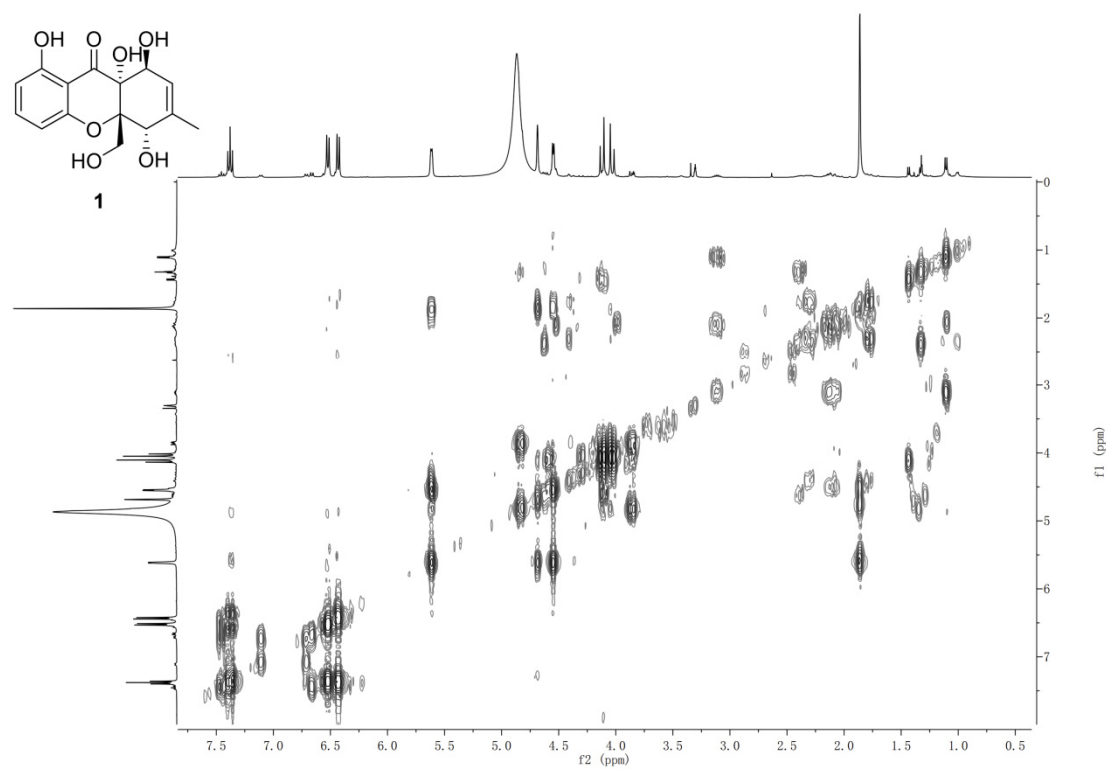

Figure S4.  $^1\text{H}$ - $^1\text{H}$  COSY of phaseolorin J (1).

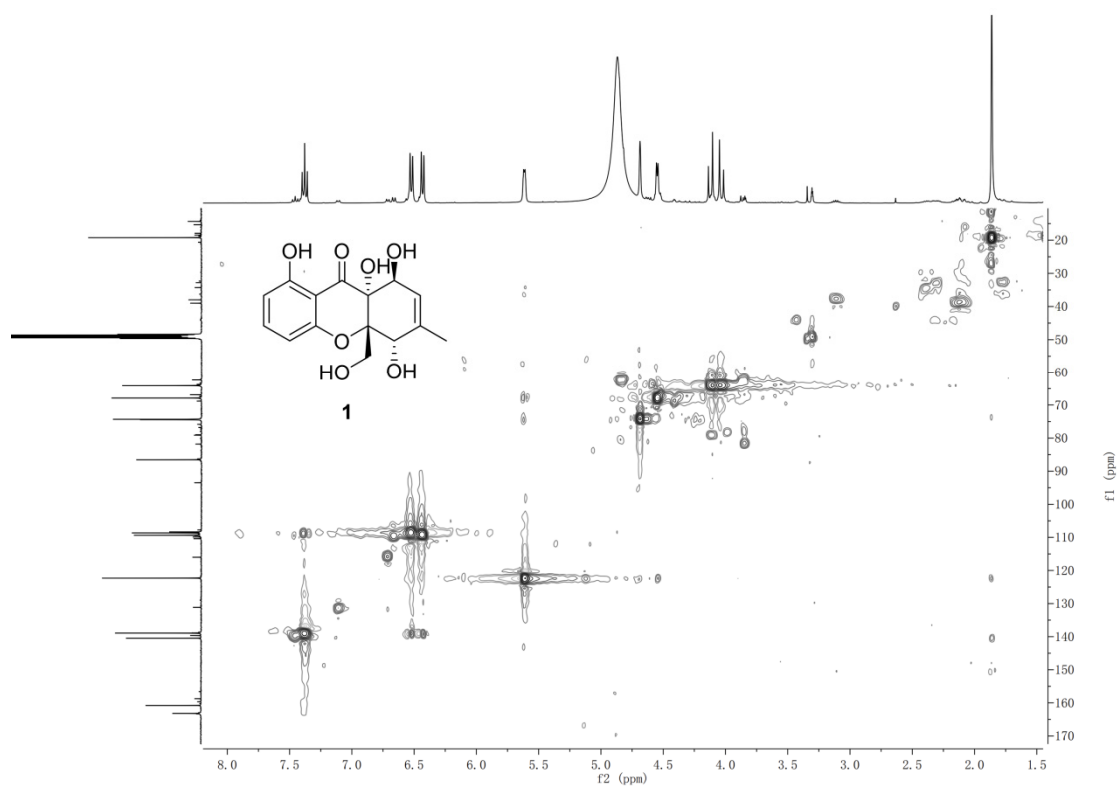

Figure S5. HSQC of phaseolorin J (1).

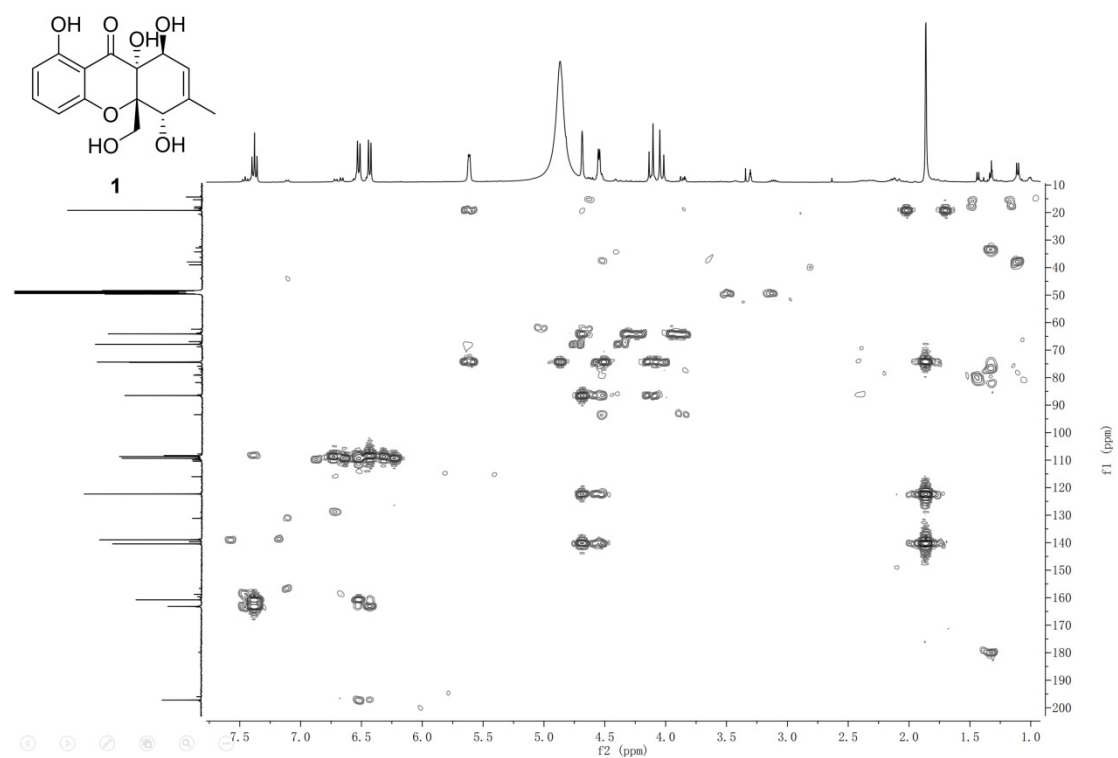

Figure S6. HMBC of phaseolorin J (1).

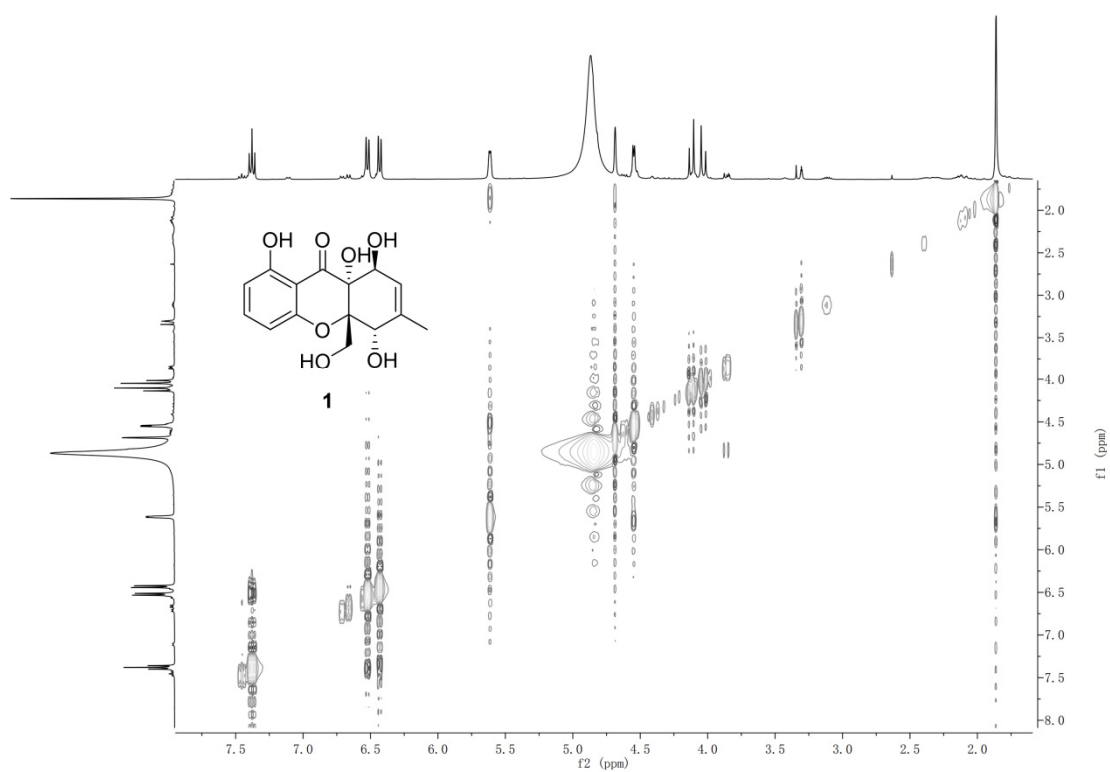

Figure S7. NOSEY of phaseolorin J (1).

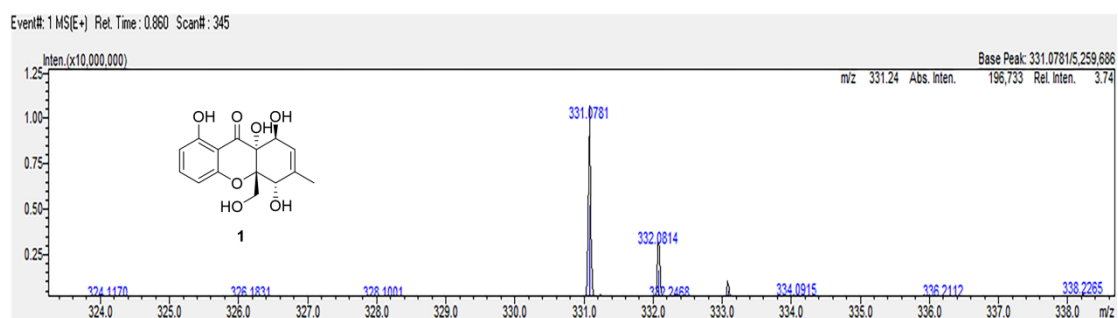

Figure S8. HR-ESI-MS of phaseolorin J (1).

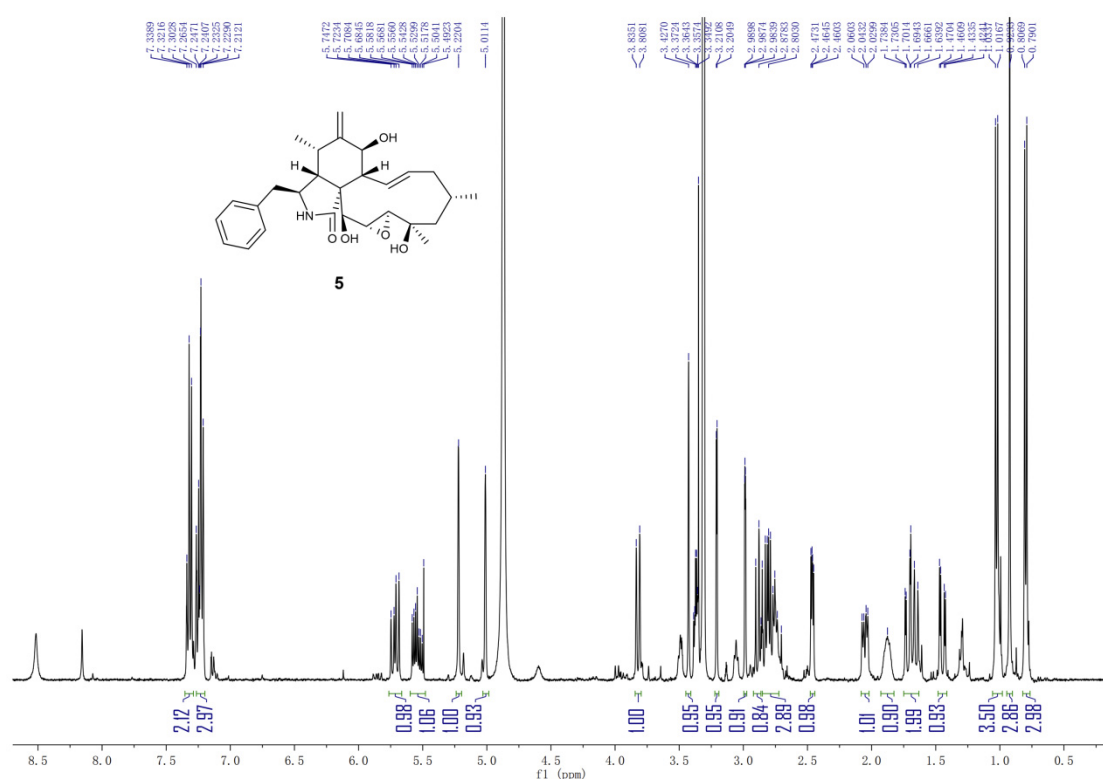

Figure S9. <sup>1</sup>H-NMR of phomoparagin D (5).

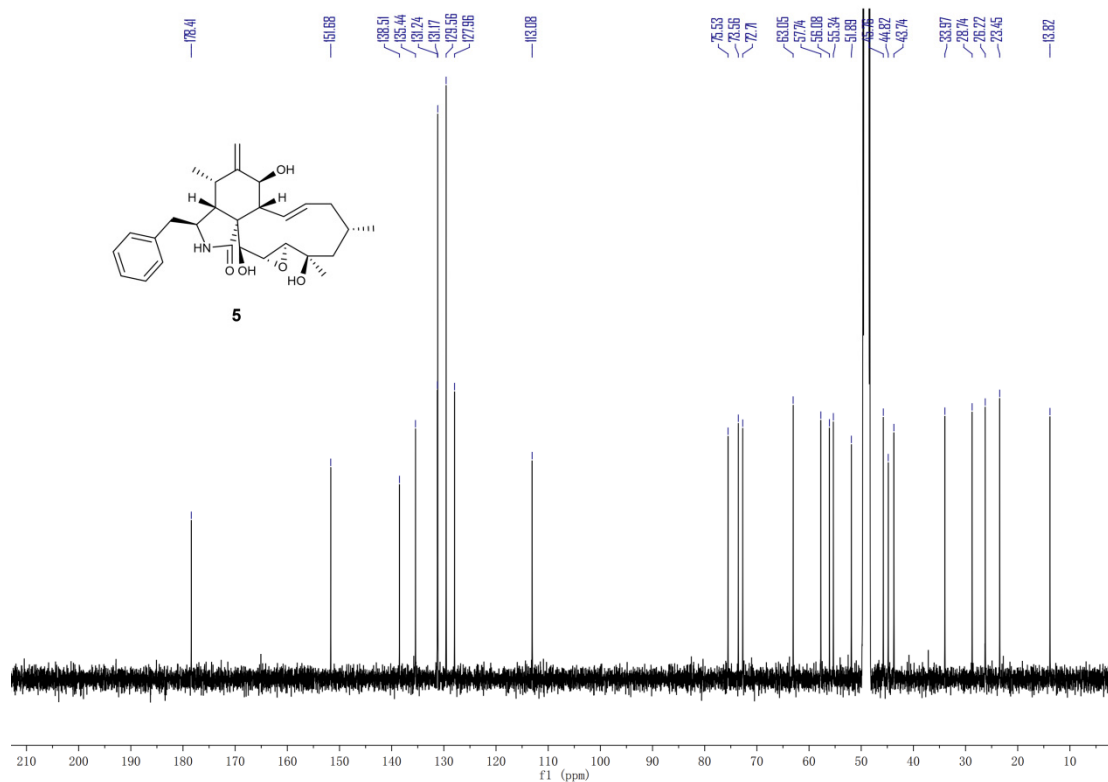

Figure S10. <sup>13</sup>C-NMR of phomoparagin D (5).



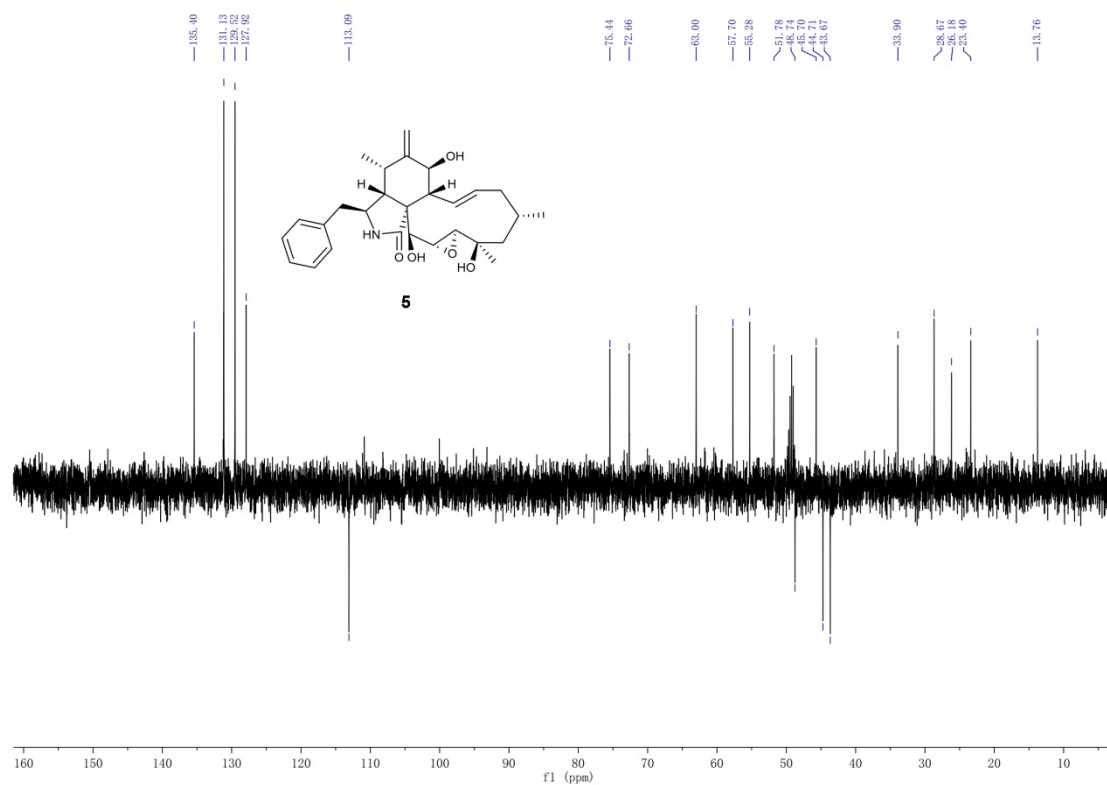

Figure S11. DEPT of phomoparagin D (5).

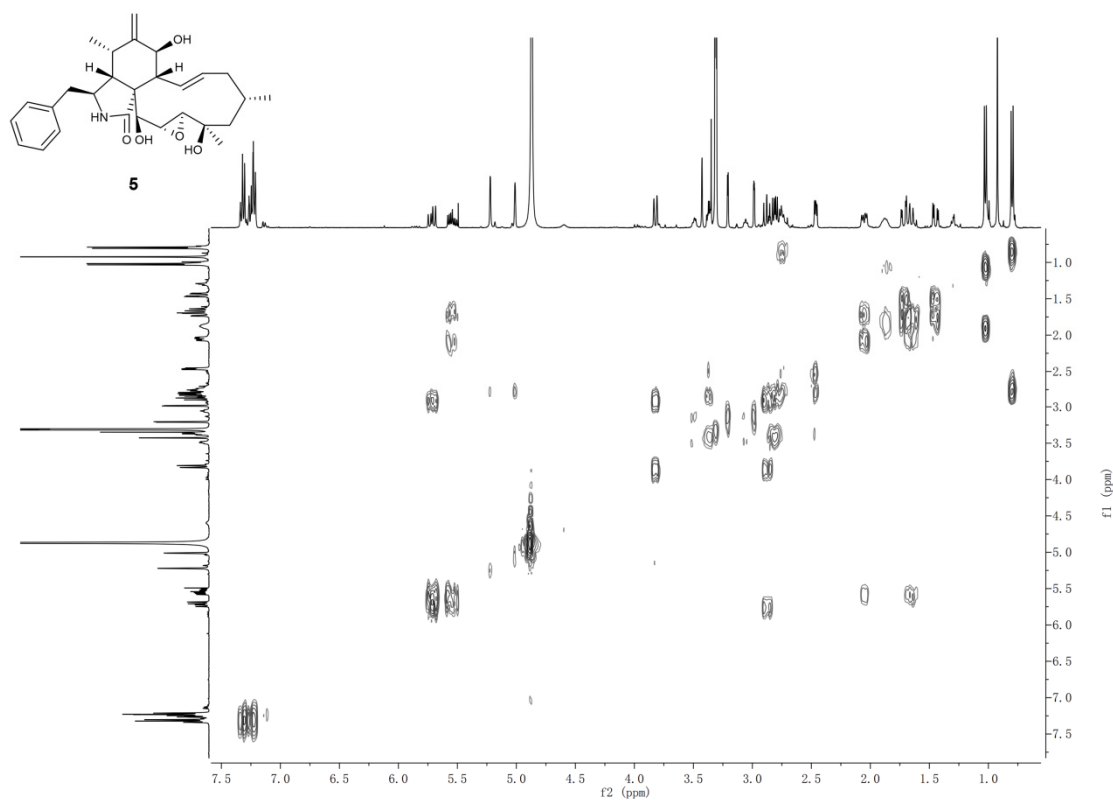

Figure S12.  $^1\text{H}$ - $^1\text{H}$  COSY of phomoparagin D (5).

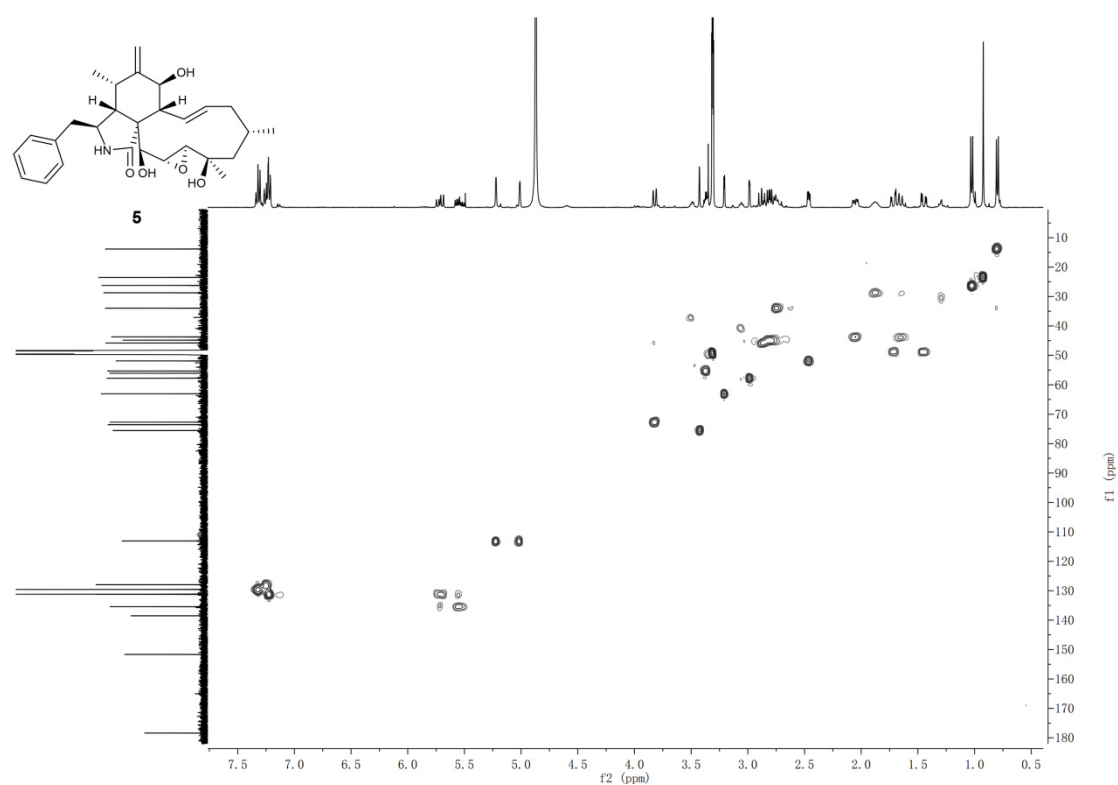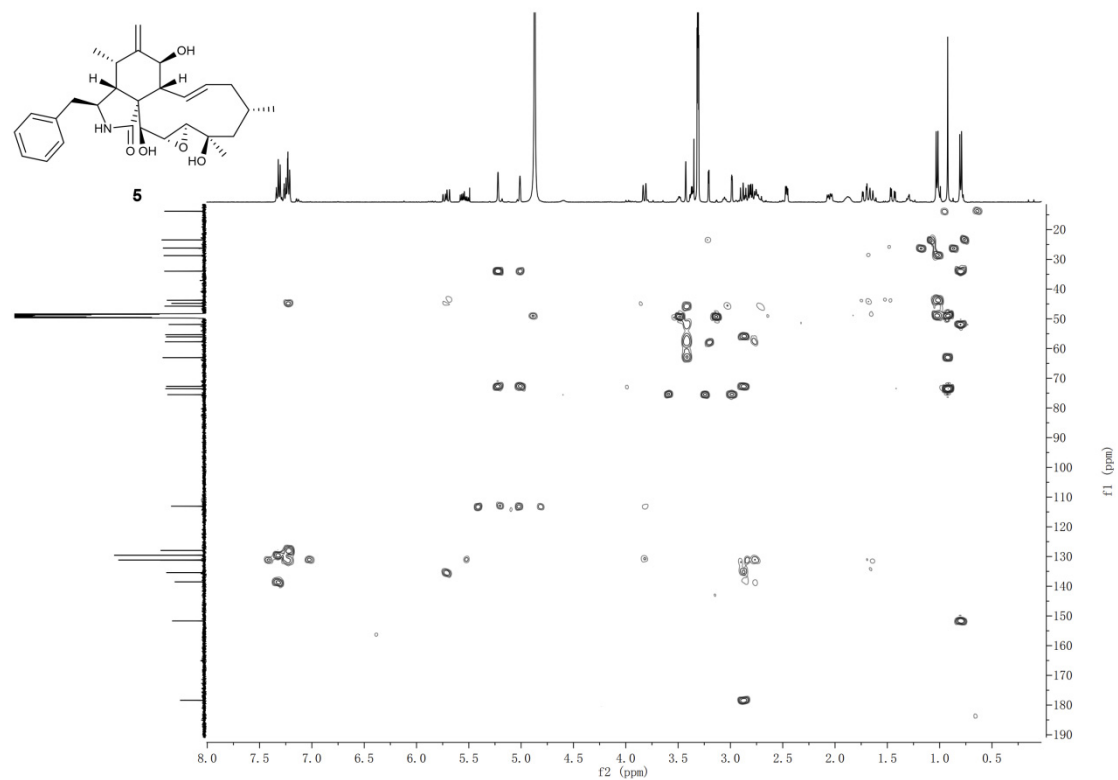

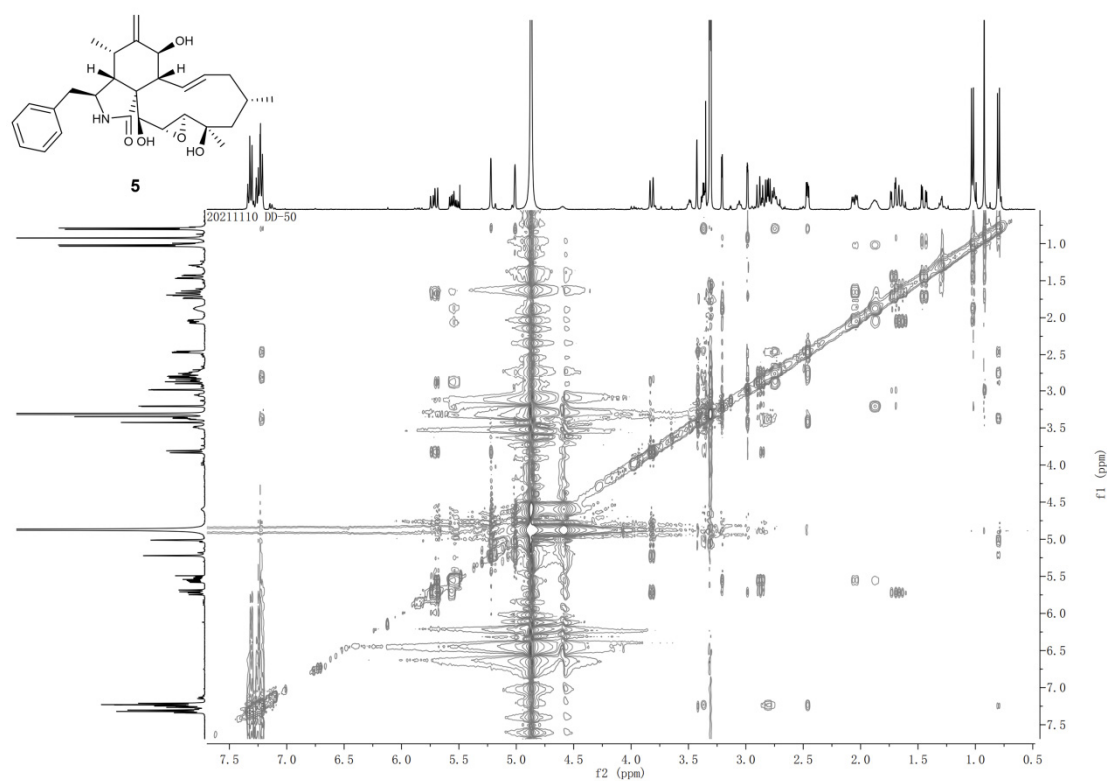

**Figure S15.** NOSEY of phomoparagin D (5).

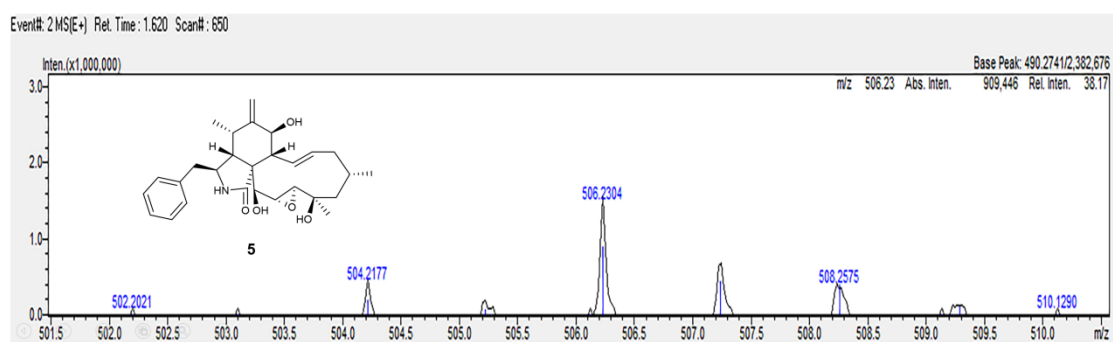

**Figure S16.** HR-ESI-MS of phomoparagin D (5).

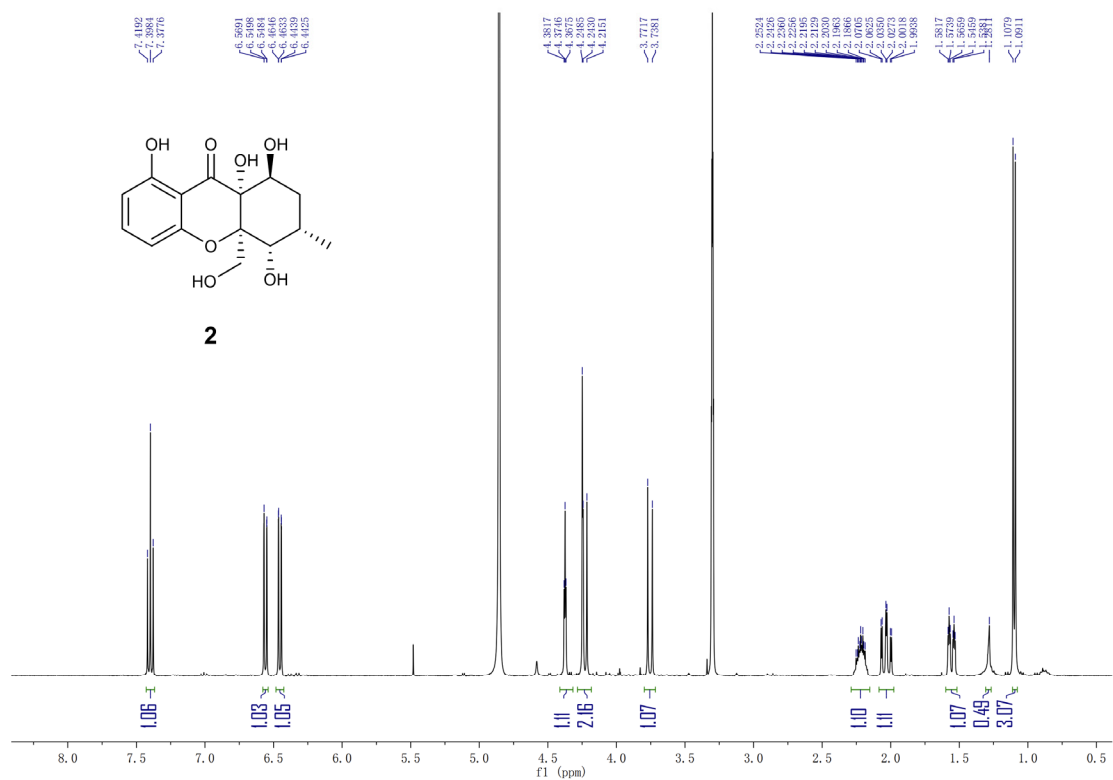

Figure S17. <sup>1</sup>H-NMR of phaseolorin D (2).

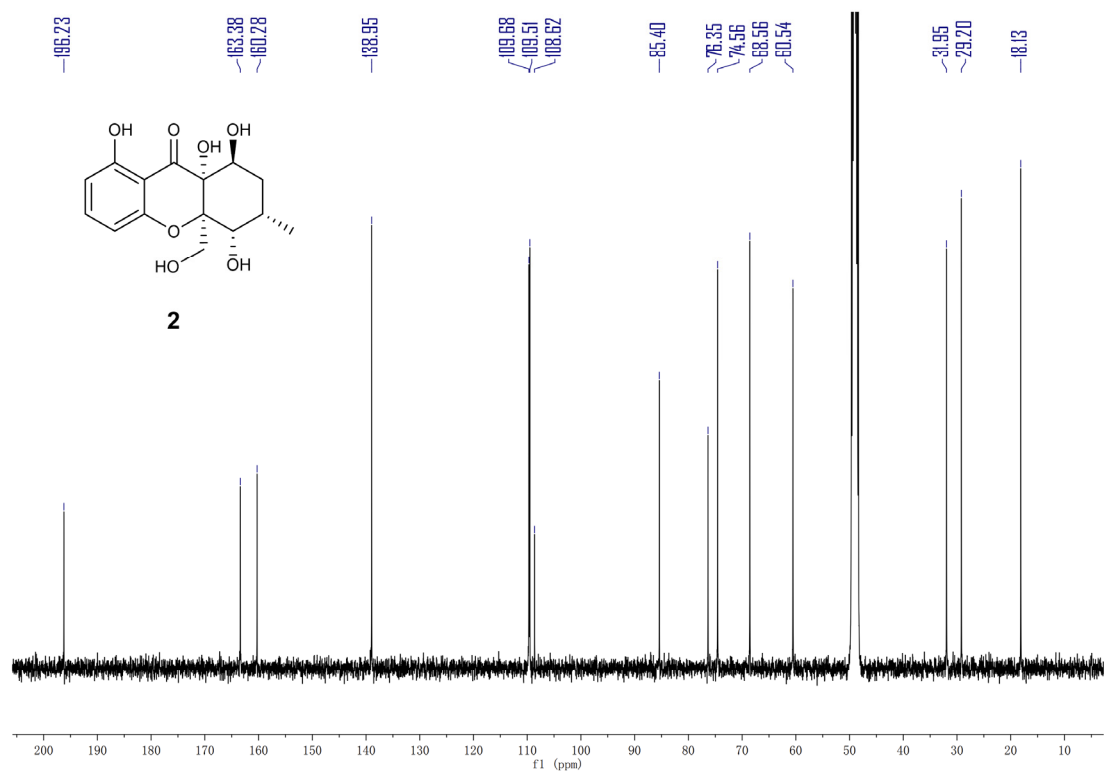

Figure S18. <sup>13</sup>C-NMR of phaseolorin D (2).

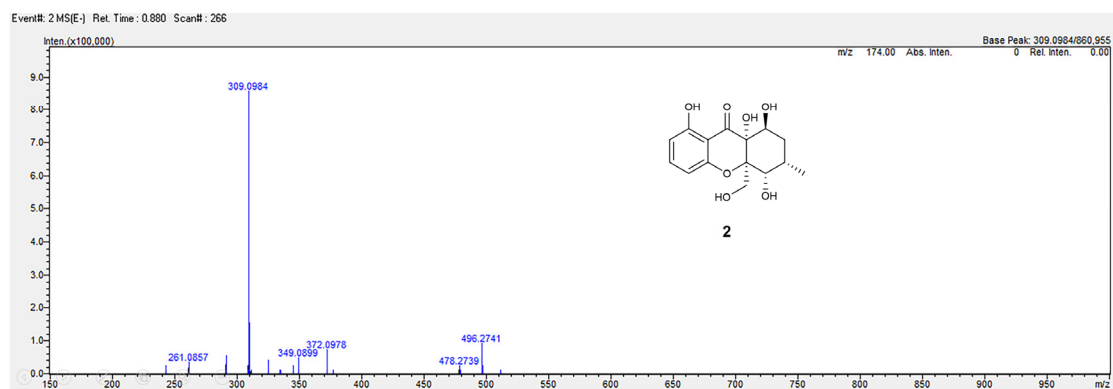

Figure S19. HR-ESI-MS of phaseolorin D (2).

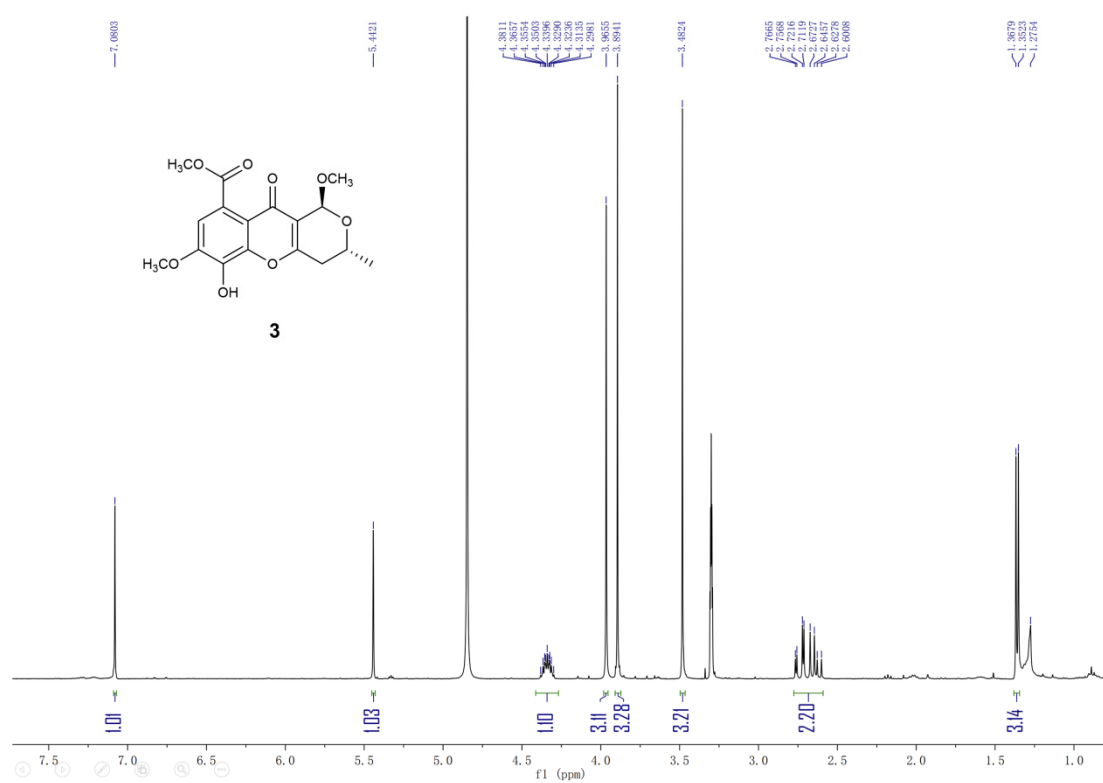

Figure S20.  $^1\text{H}$ -NMR of chaetochromone B (3).

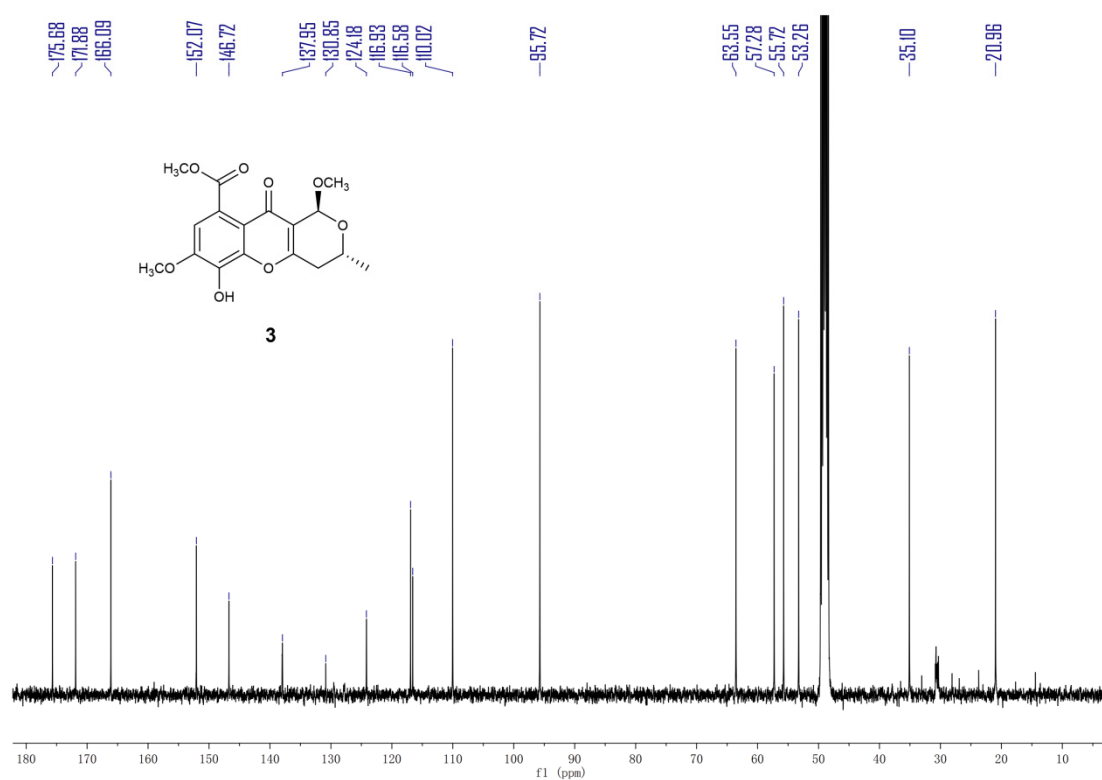

Figure S21. <sup>13</sup>C-NMR of chaetochromone B (3).

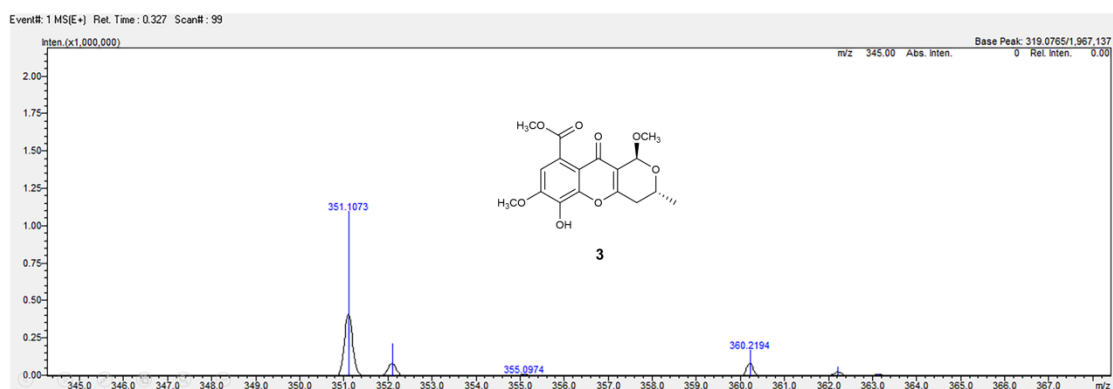

Figure S22. HR-ESI-MS of chaetochromone B (3).

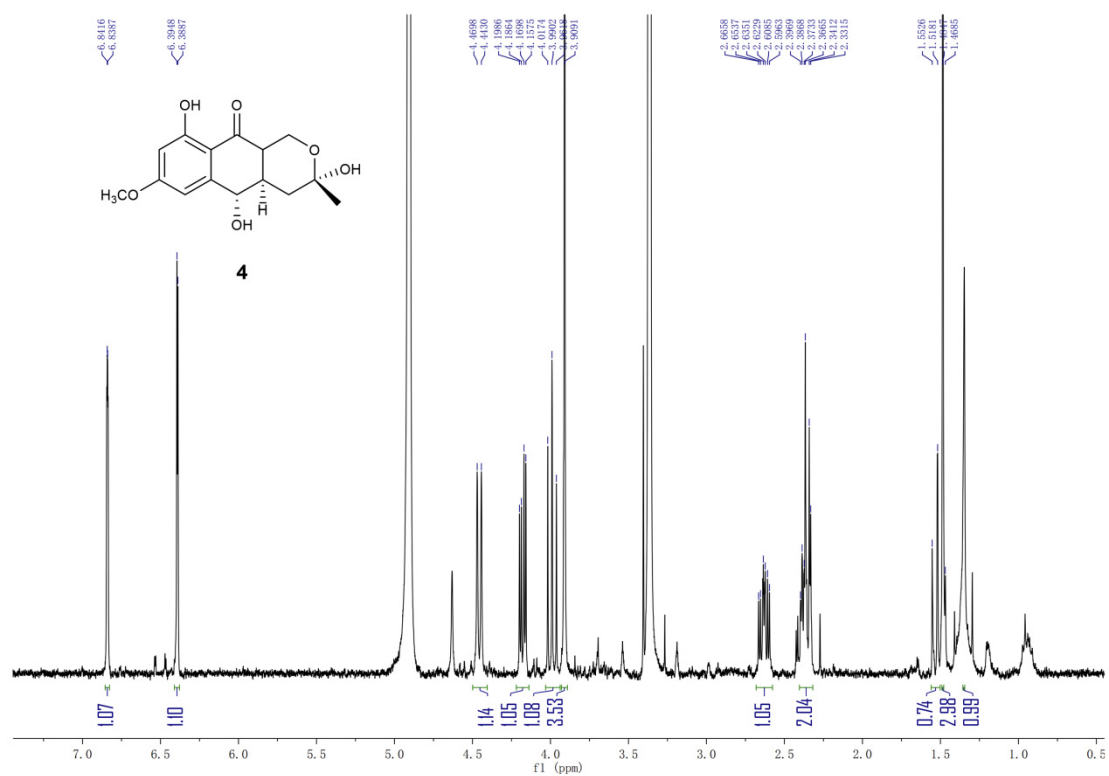

Figure S23. <sup>1</sup>H-NMR of pleosporalin D (4).

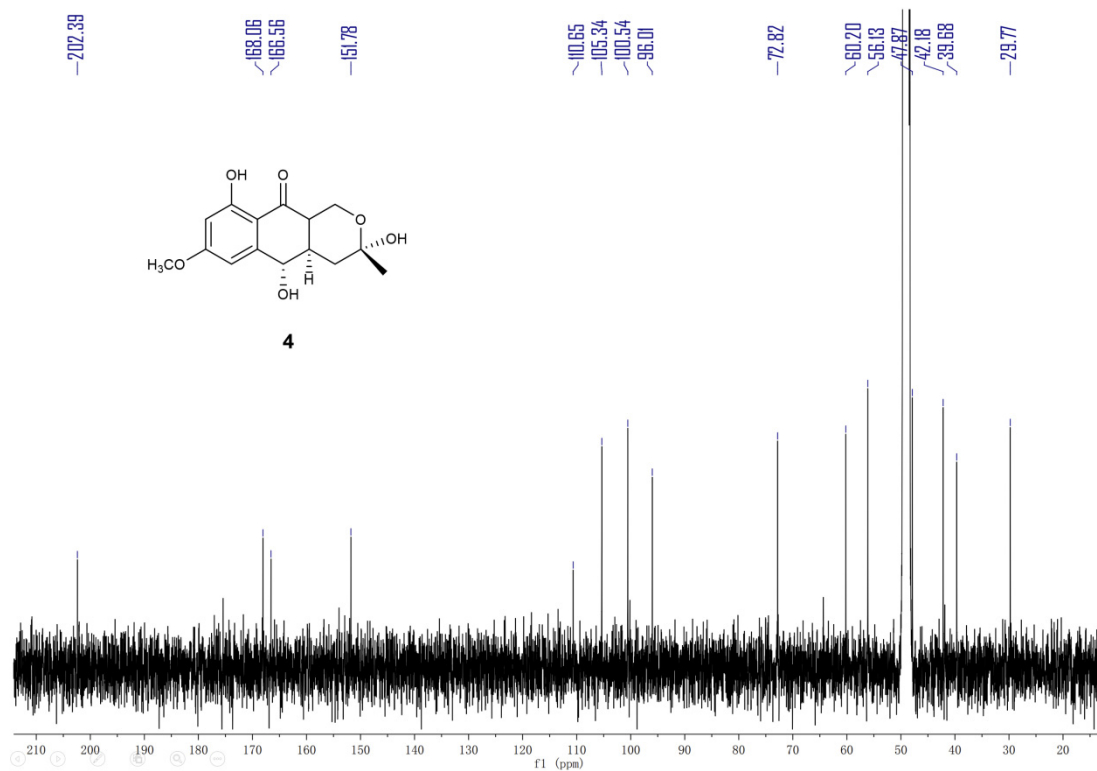

Figure S24. <sup>13</sup>C-NMR of pleosporalin D (4).

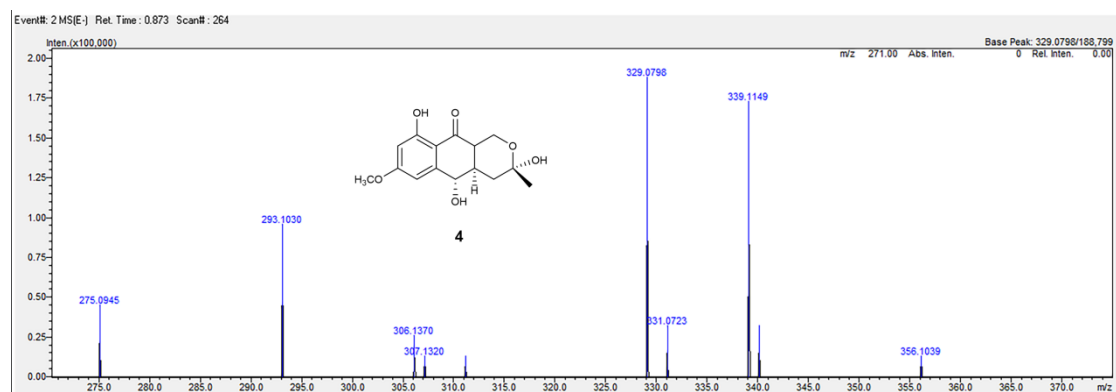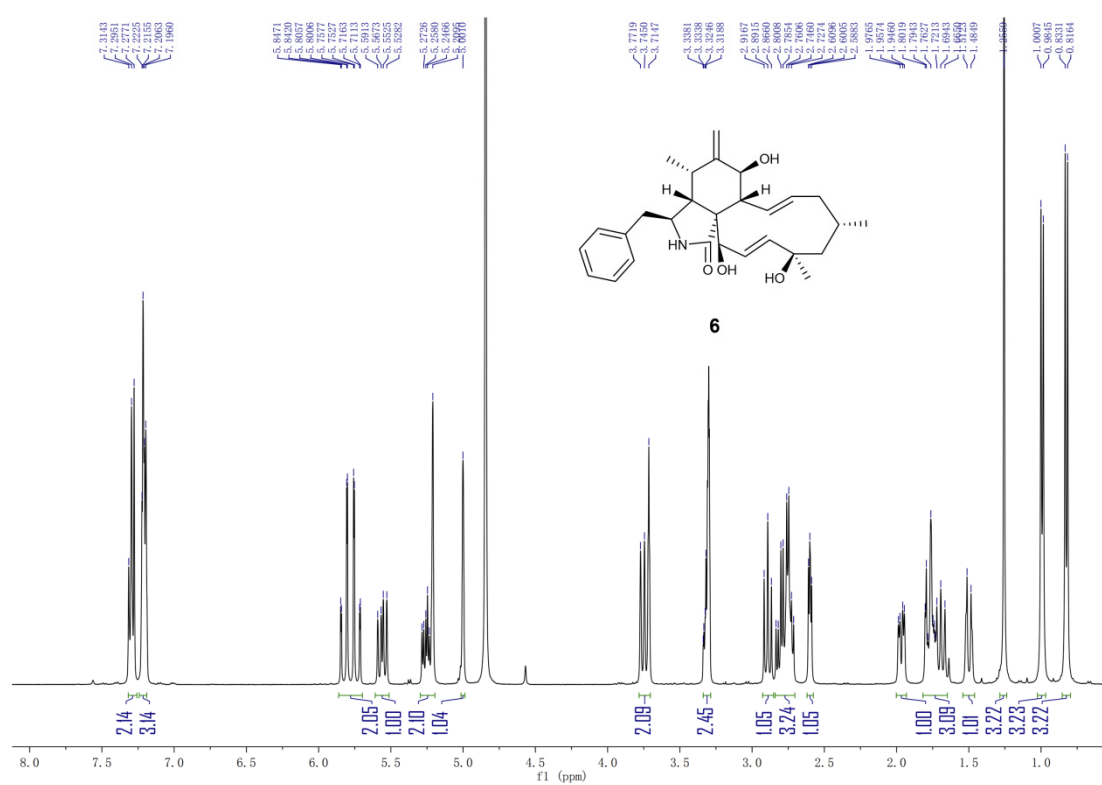





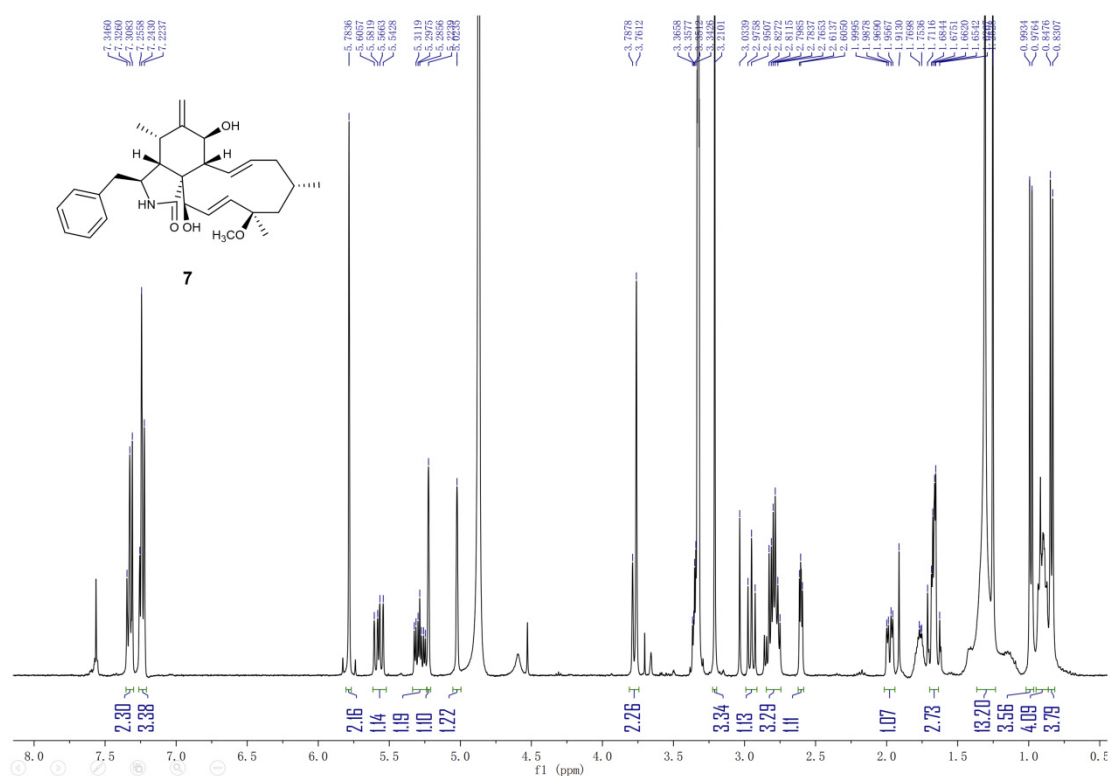

Figure S29. <sup>1</sup>H-NMR of cytochalasin J<sub>1</sub> (7).

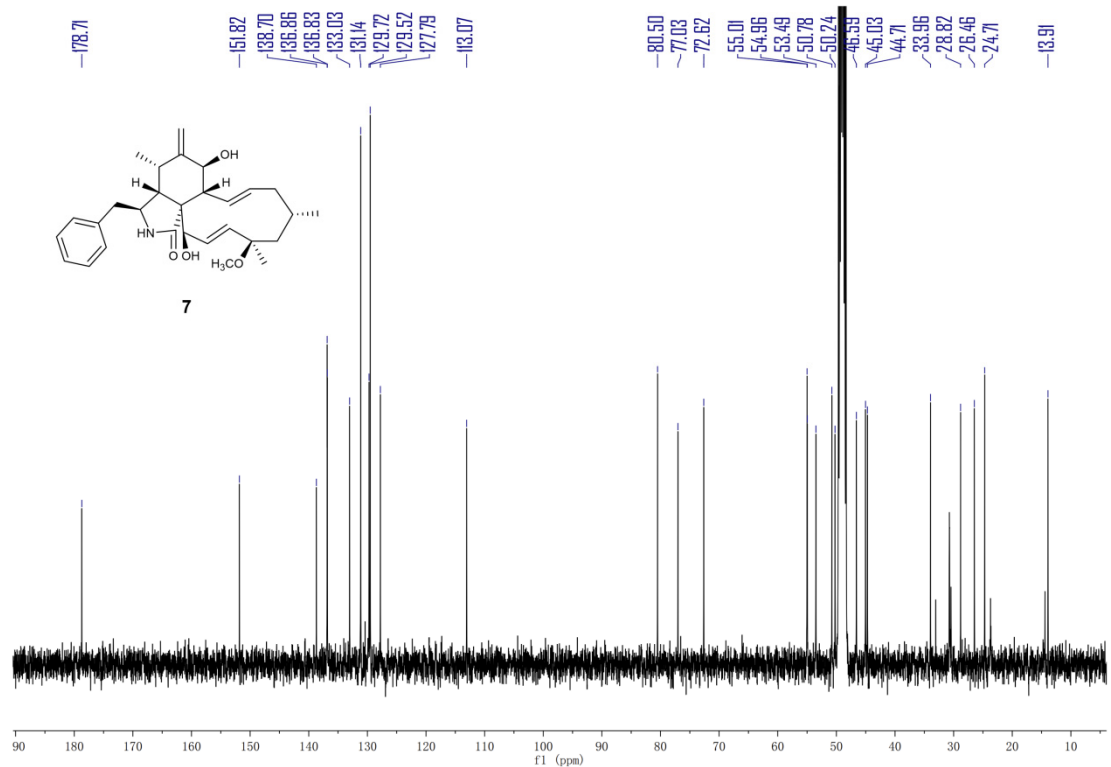

Figure S30. <sup>13</sup>C-NMR of cytochalasin J<sub>1</sub> (7).

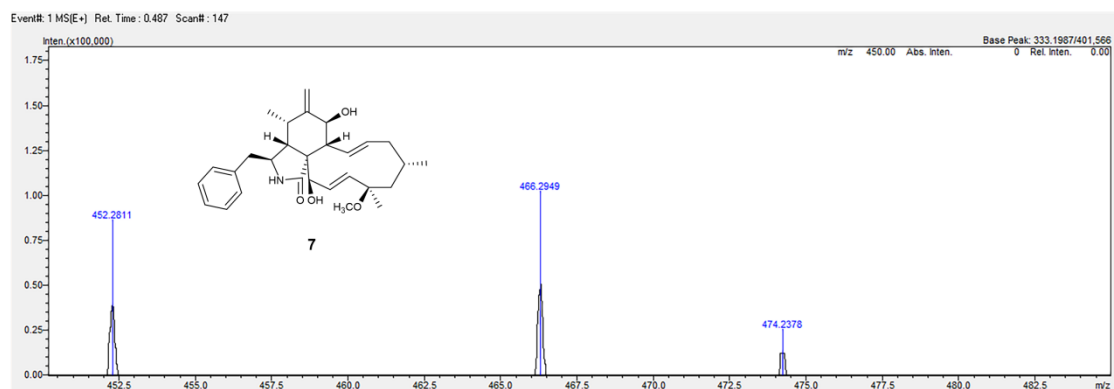

Figure S31. HR-ESI-MS of cytochalasin J<sub>1</sub> (7).

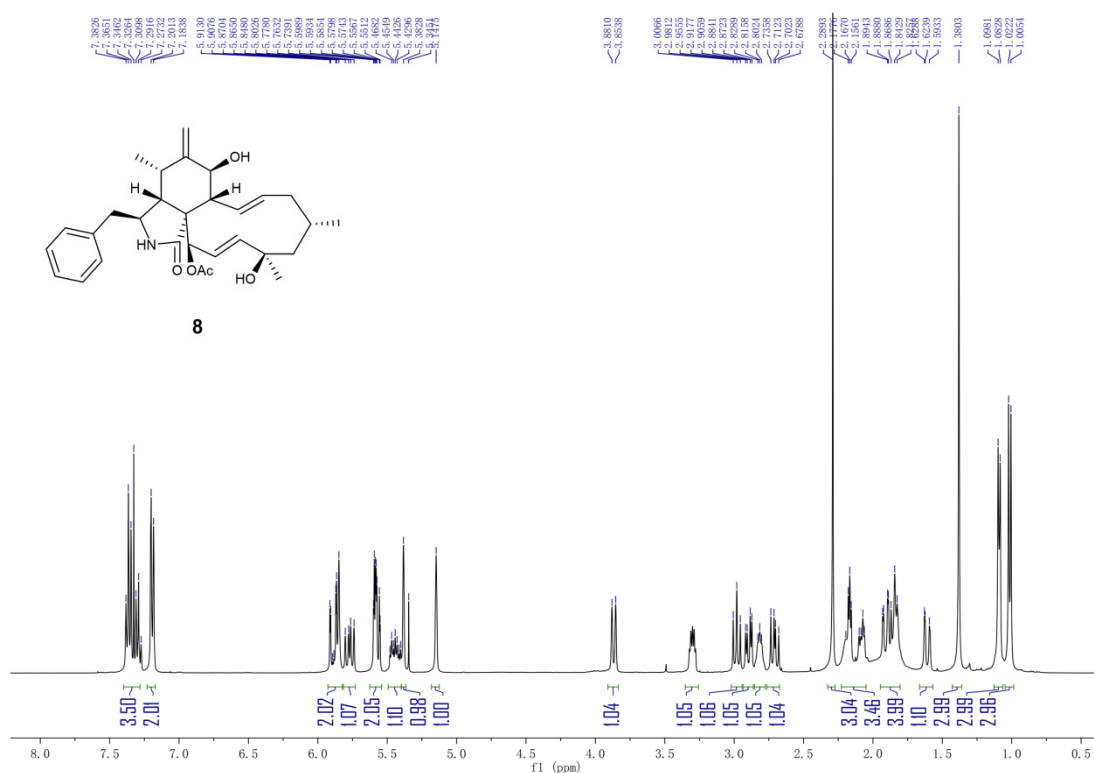

Figure S32. <sup>1</sup>H-NMR of cytochalasin H (8).

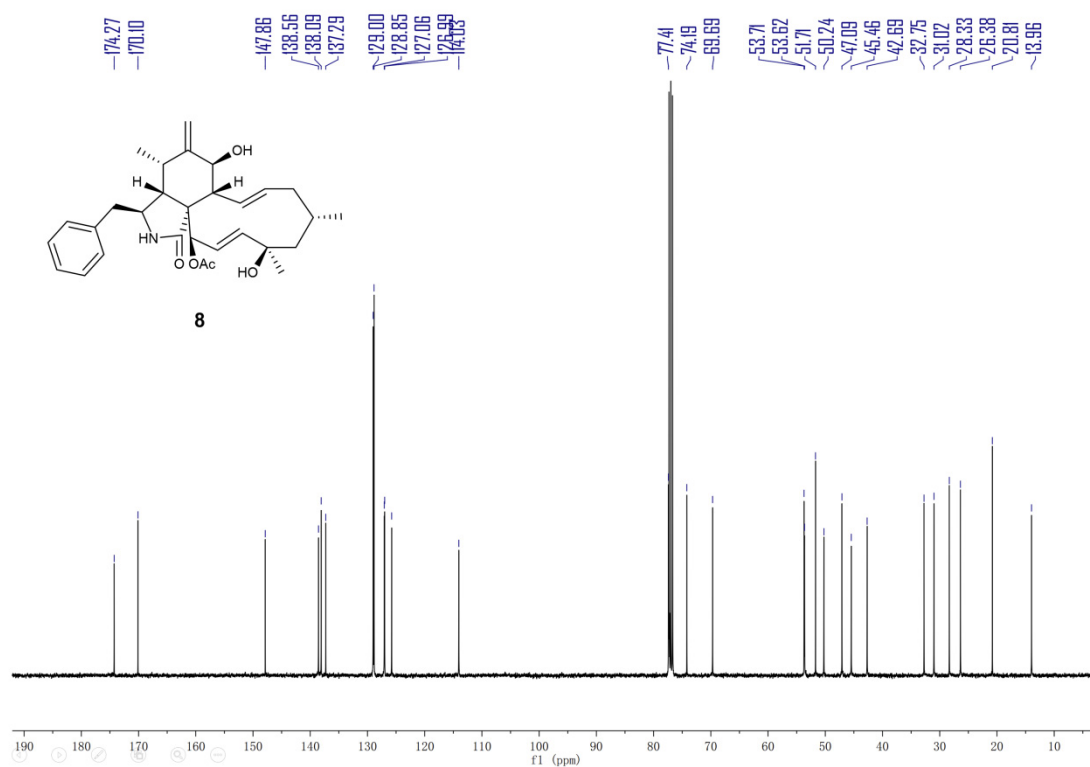

Figure S33.  $^{13}\text{C}$ -NMR of cytochalasin H (8).

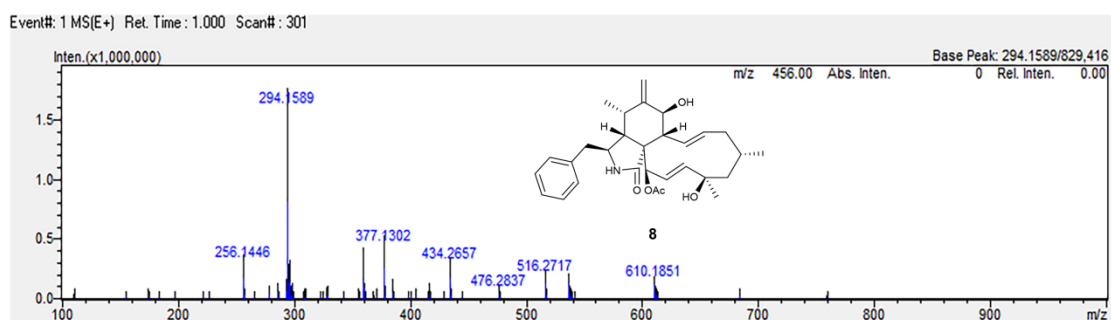

Figure S34. HR-ESI-MS of cytochalasin H (8).

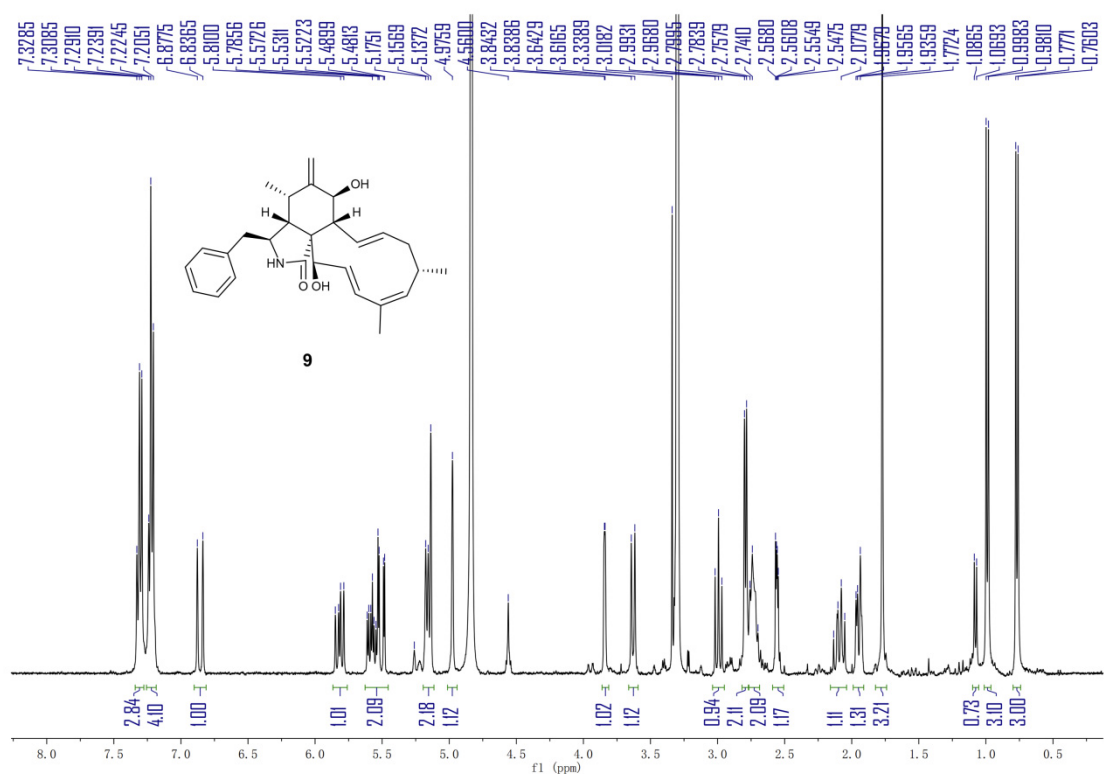

Figure S35. <sup>1</sup>H-NMR of cytochalasin J<sub>2</sub> (9).

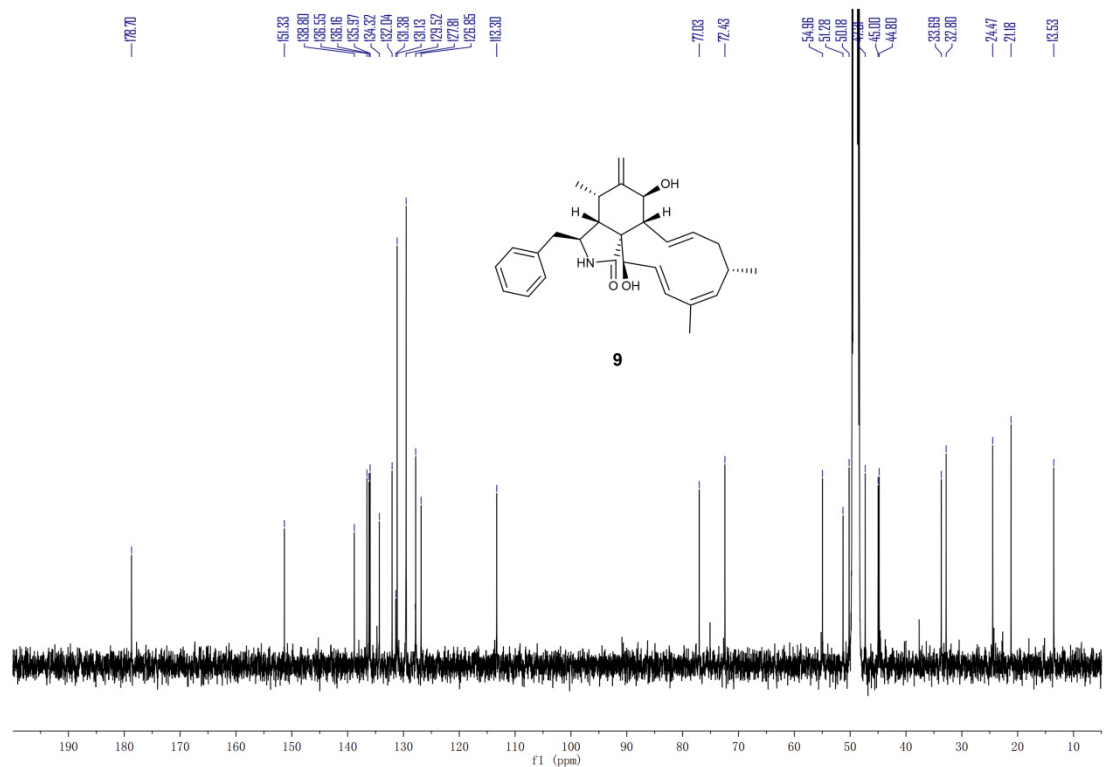

Figure S36. <sup>13</sup>C-NMR of cytochalasin J<sub>2</sub> (9).

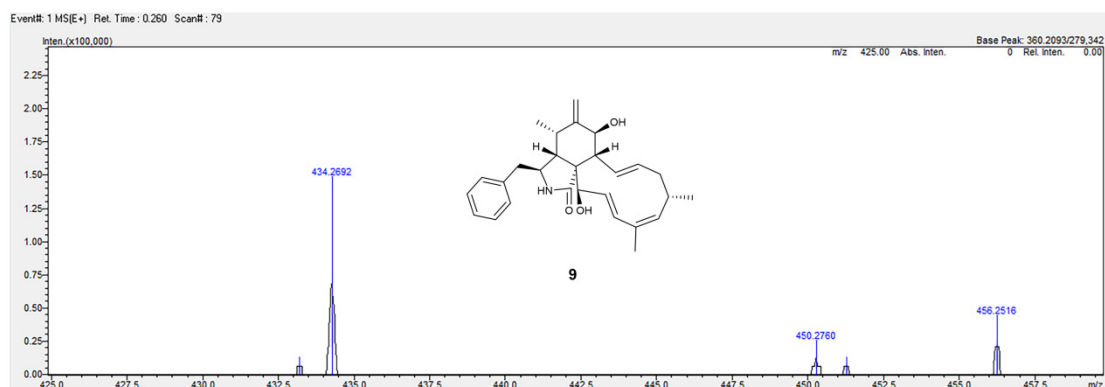

Figure S37. HR-ESI-MS of cytochalasin J<sub>2</sub> (9).

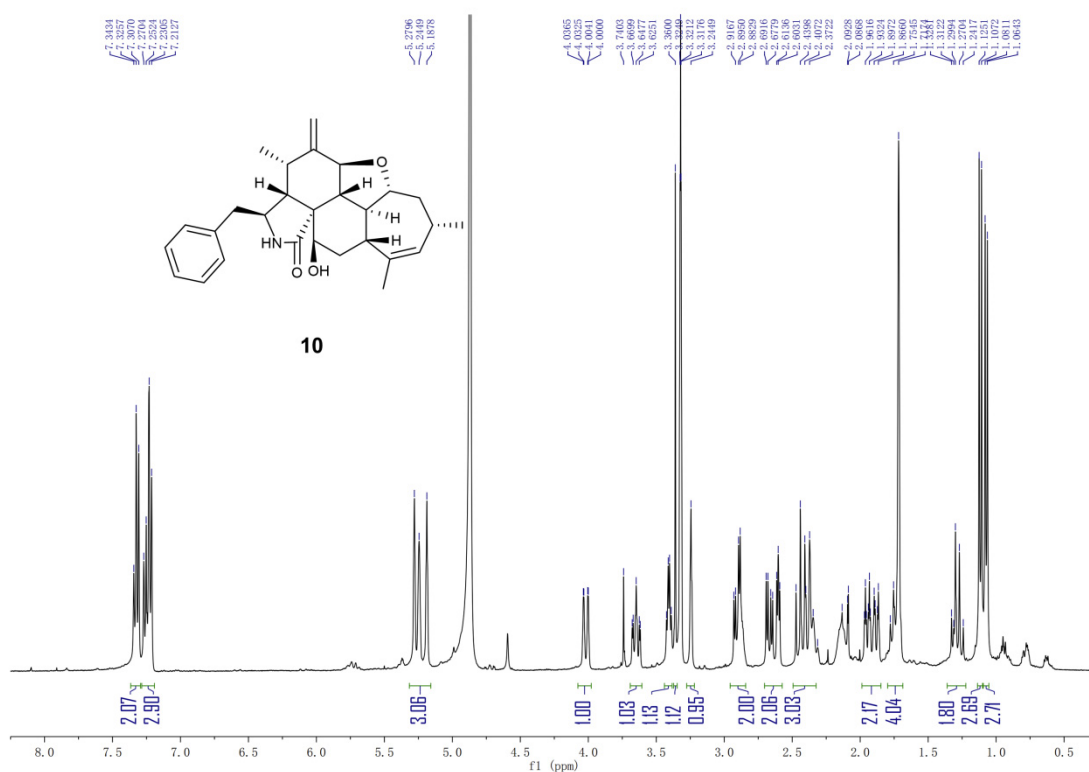

Figure S38. <sup>1</sup>H-NMR of cytochalasin J<sub>3</sub> (10).

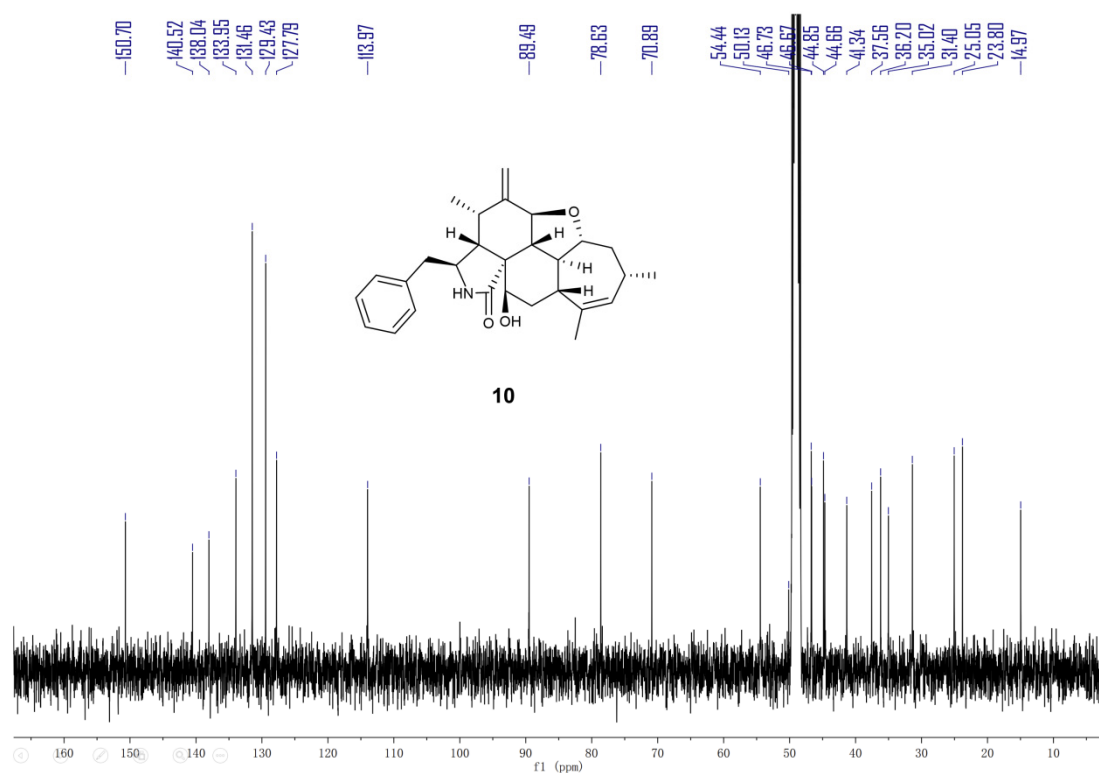

Figure S39. <sup>13</sup>C-NMR of cytochalasin J<sub>3</sub> (10).

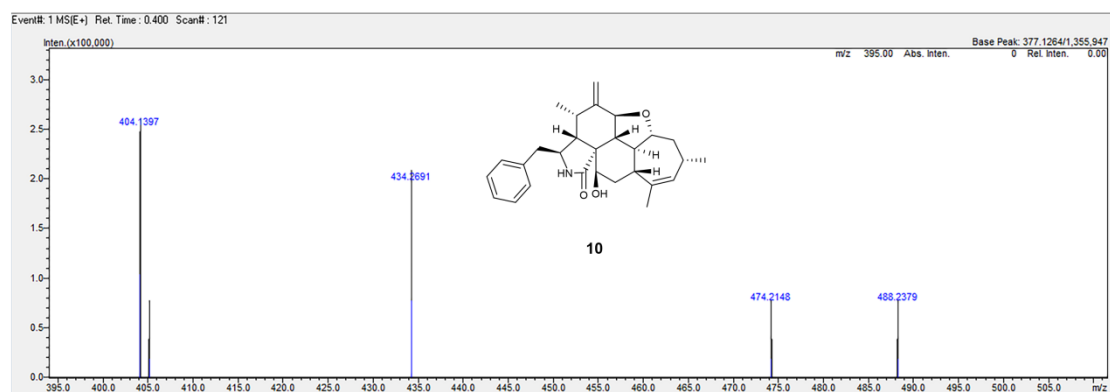

Figure S40. HR-ESI-MS of cytochalasin J<sub>3</sub> (10).

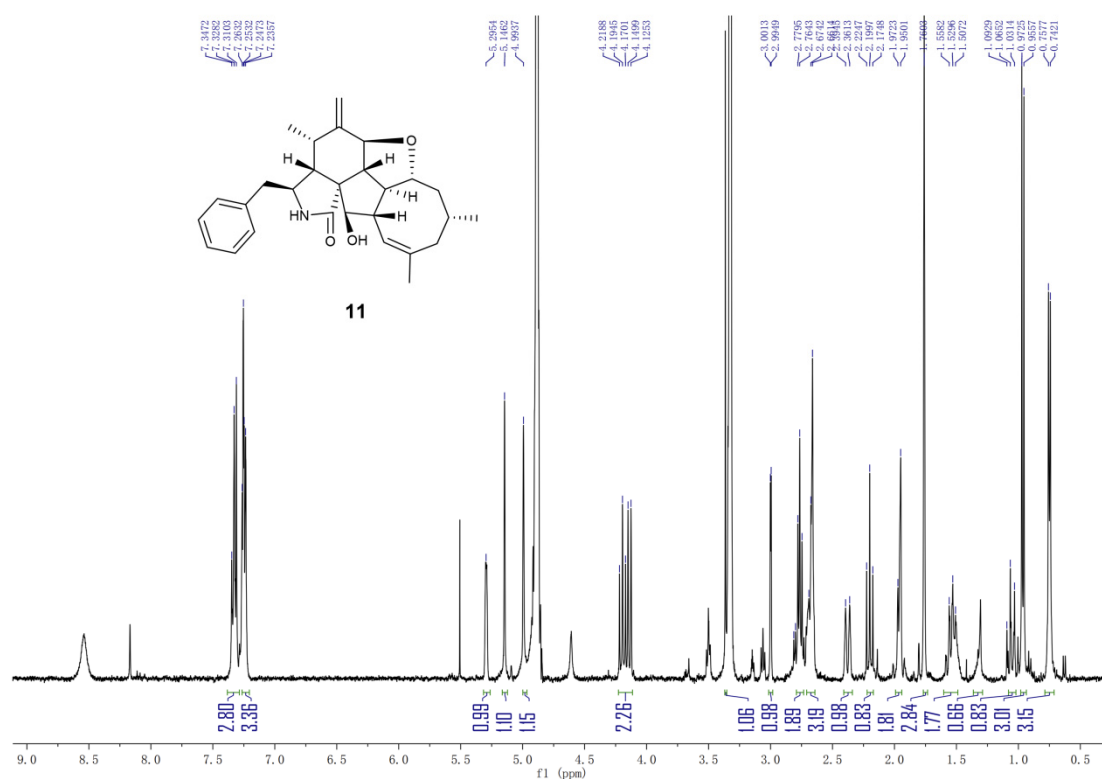

Figure S41. <sup>1</sup>H-NMR of phomopchalasin D (11).

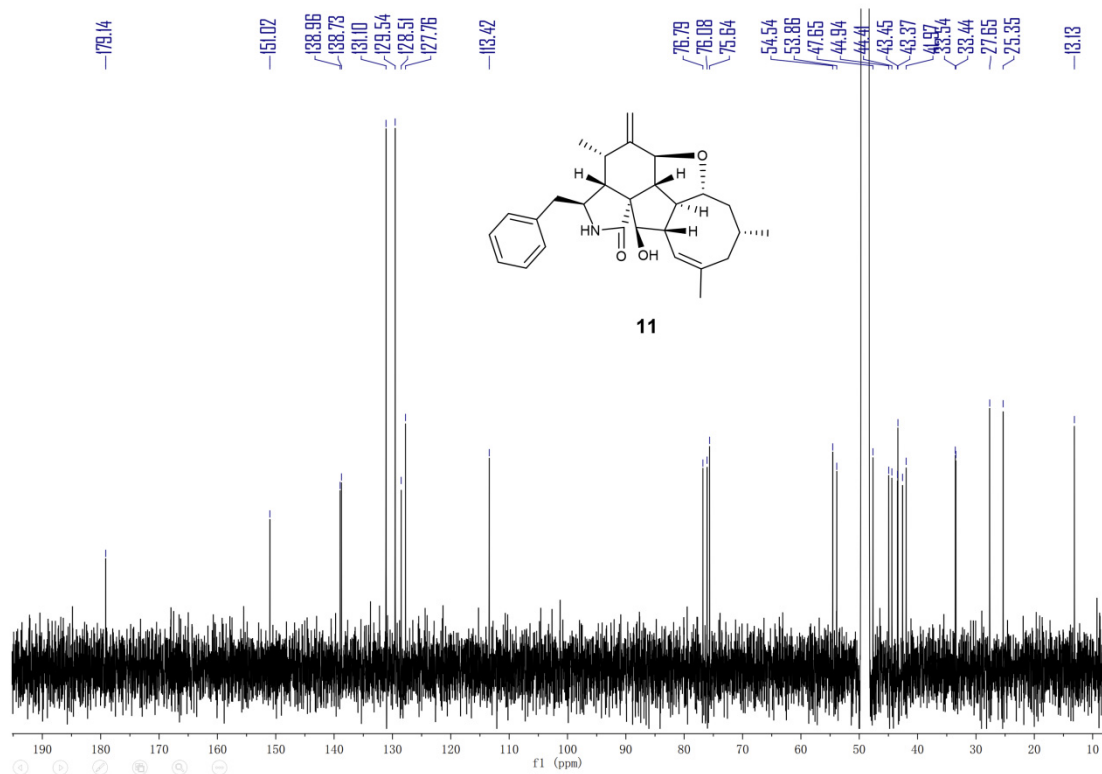

Figure S42. <sup>13</sup>C-NMR of phomopchalasin D (11).



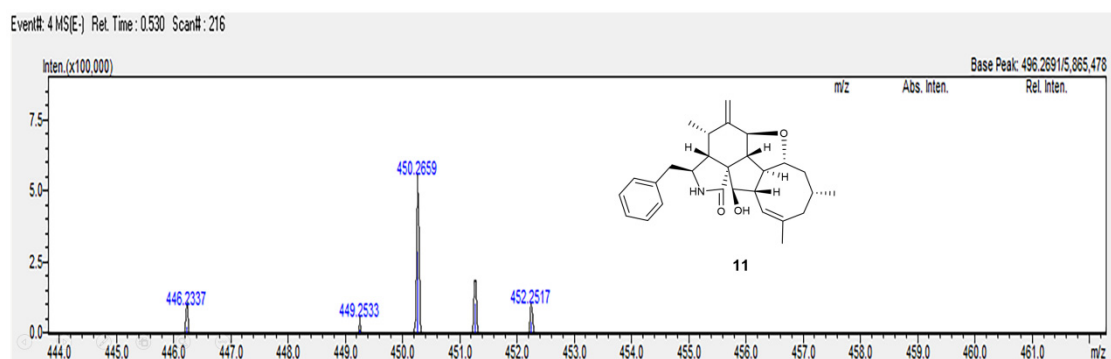

**Figure S43.** HR-ESI-MS of phomopchalasin D (**11**).

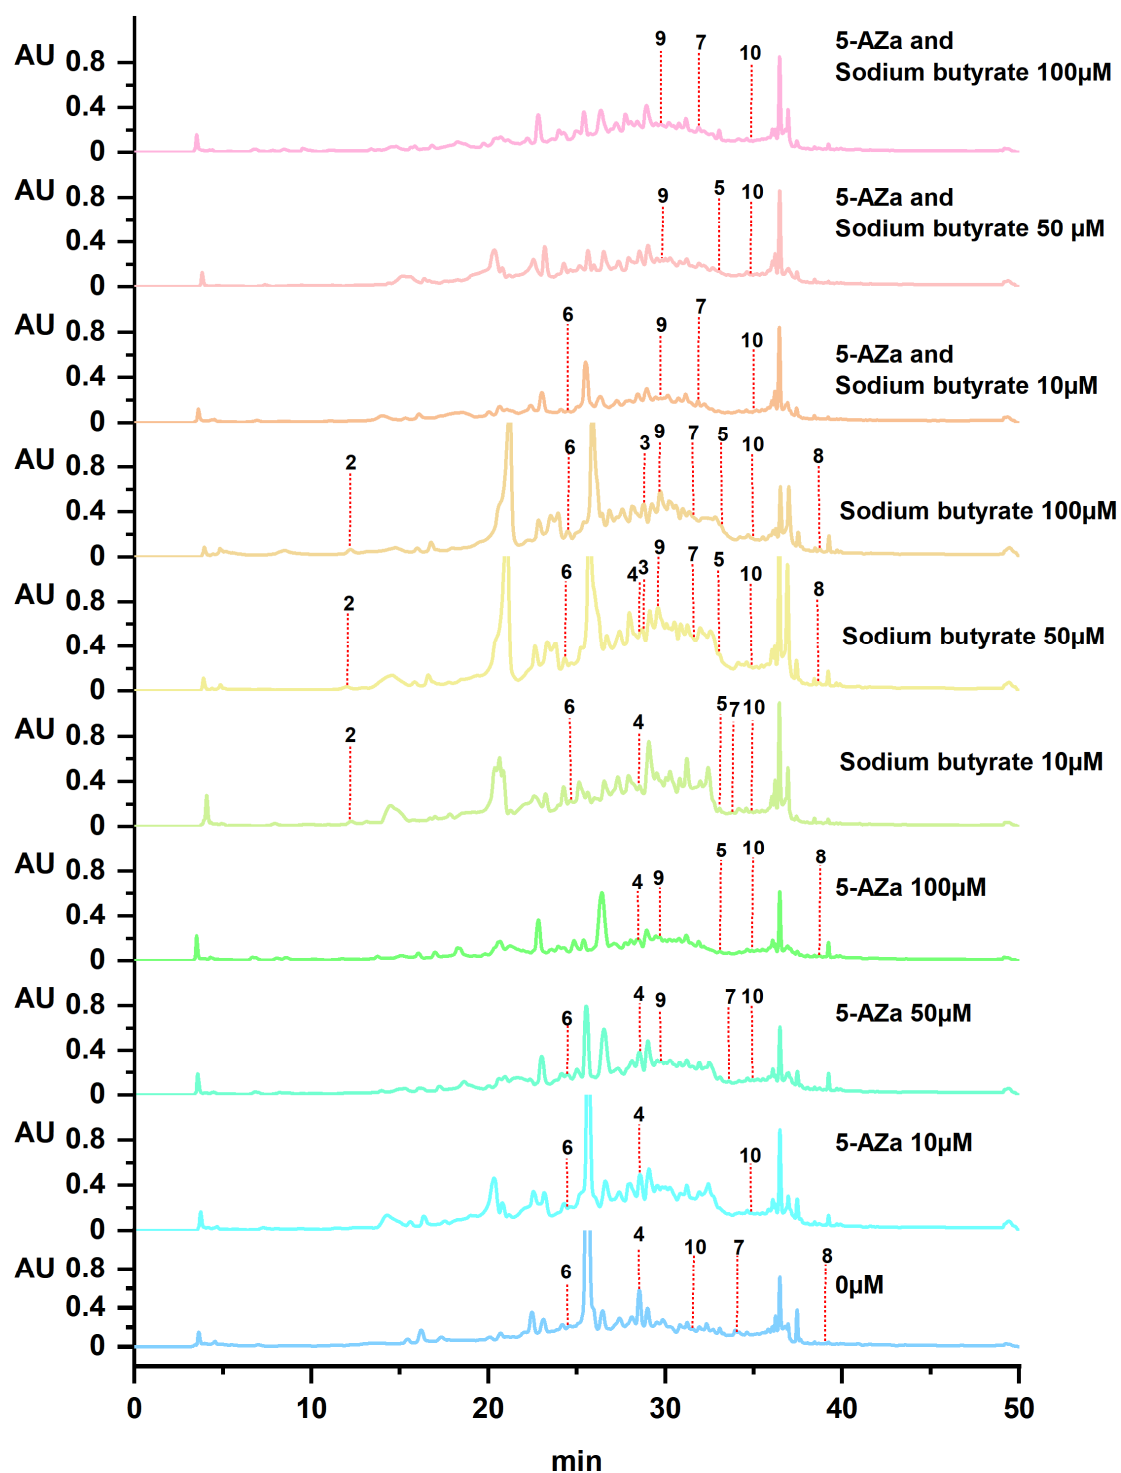

**Figure S44.** Overlay of HPLC profiles of EtOAc extracts of *Phomopsis asparagi* DHS-48 cultivated in PDA treated with different epigenetic agents.

**Figure S45.** HPLC spectrum for the purity of tested compounds. HPLC chromatograms: C18 column (Agilent Technologies 10 mm×250 mm). Solvents: A, H<sub>2</sub>O; B, MeOH. Linear gradient: 0 min, 60% B; 40 min, 100% B. Temperature 25°C. Flow rate 2 mL/min. UV detection

at  $\lambda = 210\text{ nm}$ .

Compound 1

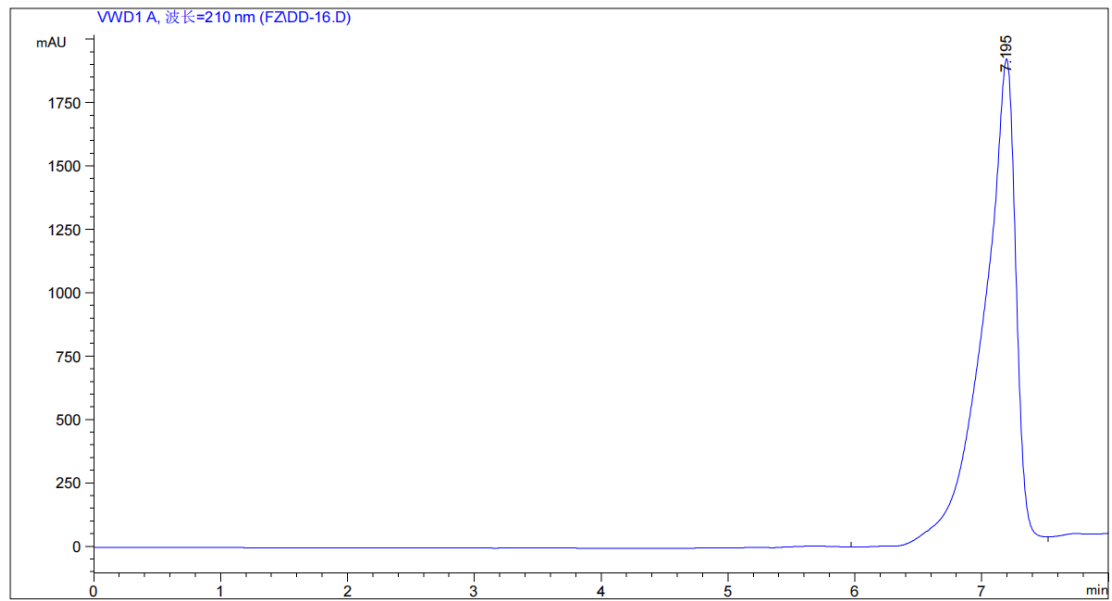

| Peak # | Retention time [min] | Peak type | Peak width [min] | Peak area mAU * s | Peak height [mAU] | Peak area% |
|--------|----------------------|-----------|------------------|-------------------|-------------------|------------|
| 1      | 7.195                | VV        | 0.2547           | 3.52018e4         | 1920.09363        | 100.0000   |
| sum :  |                      |           |                  | 3.52018e4         | 1920.09363        |            |

Compound 2

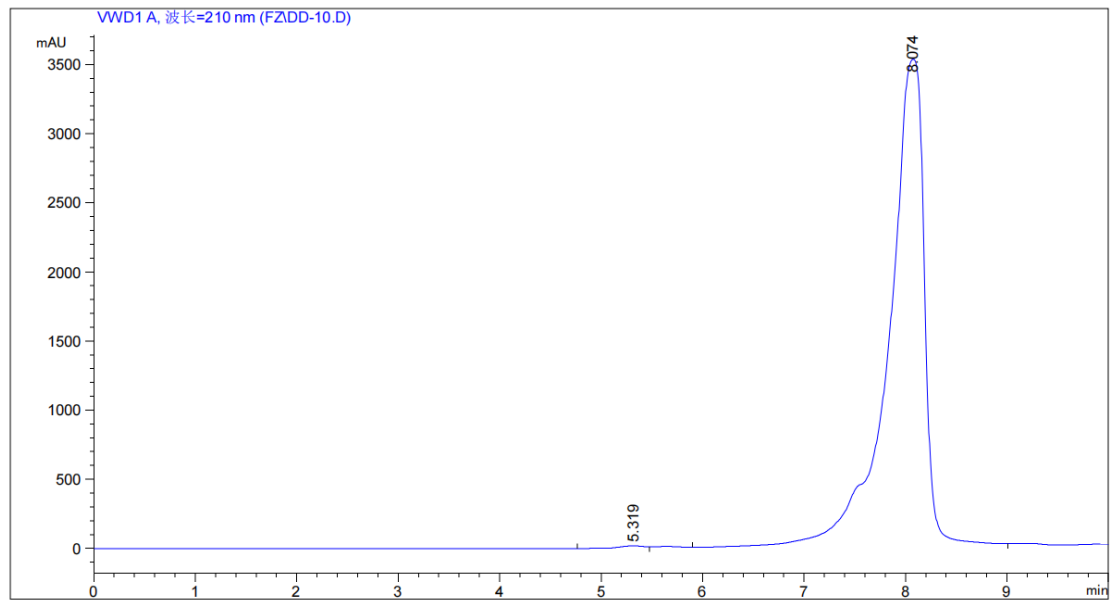

| Peak Retention time | Peak type | Peak width | Peak area | Peak height | Peak area% |
|---------------------|-----------|------------|-----------|-------------|------------|
|---------------------|-----------|------------|-----------|-------------|------------|

| # | [min] |    | [min]  | mAU       | *s | [mAU ]     | %        |
|---|-------|----|--------|-----------|----|------------|----------|
| 1 | 7.195 | VV | 0.2547 | 3.52018e4 |    | 1920.09363 | 100.0000 |

sum : 3.52018e4 1920.09363

### Compound 3

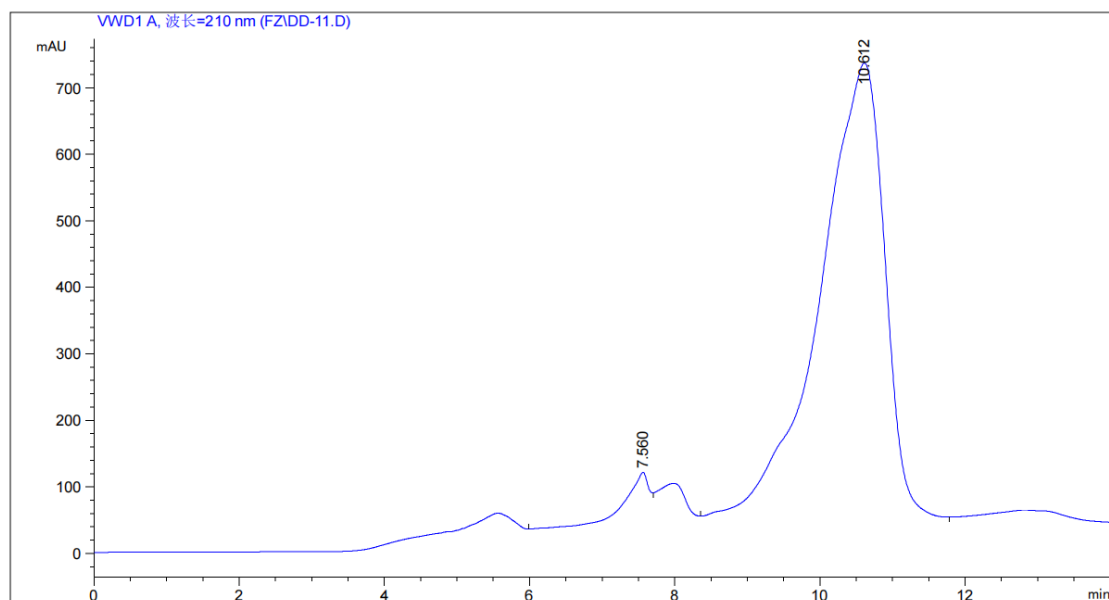

| Peak Retention time | Peak type | Peak width | Peak area | Peak height | Peak area% |
|---------------------|-----------|------------|-----------|-------------|------------|
|---------------------|-----------|------------|-----------|-------------|------------|

| # | [min]  |    | [min]  | mAU        | *s | [mAU ]    | %       |
|---|--------|----|--------|------------|----|-----------|---------|
| 1 | 7.560  | VV | 0.5985 | 5753.92334 |    | 119.12096 | 9.8707  |
| 2 | 10.612 | VV | 0.9628 | 5.25392e4  |    | 734.33246 | 90.1293 |

sum : 5.82932e4 853.45342

### Compound 4

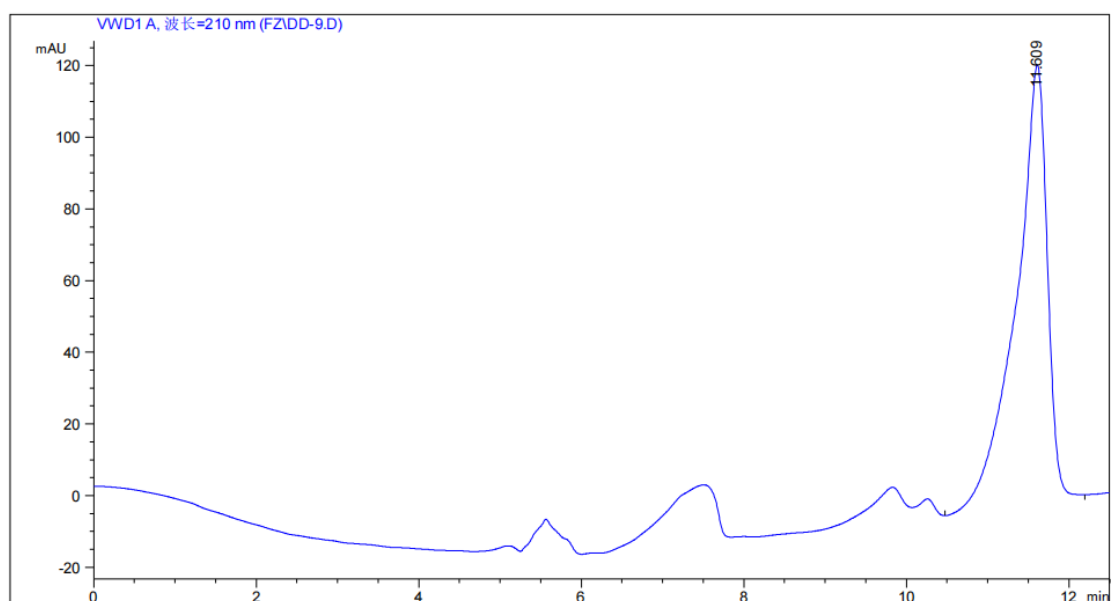

| Peak # | Retention time [min] | Peak type | Peak width [min] | Peak area mAU * s | Peak height [mAU] | Peak area% |
|--------|----------------------|-----------|------------------|-------------------|-------------------|------------|
| 1      | 11.609               | VV        | 0.4622           | 4645.15332        | 136.13113         | 100.0000   |

sum : 4645.15332 136.13113

### Compound 5

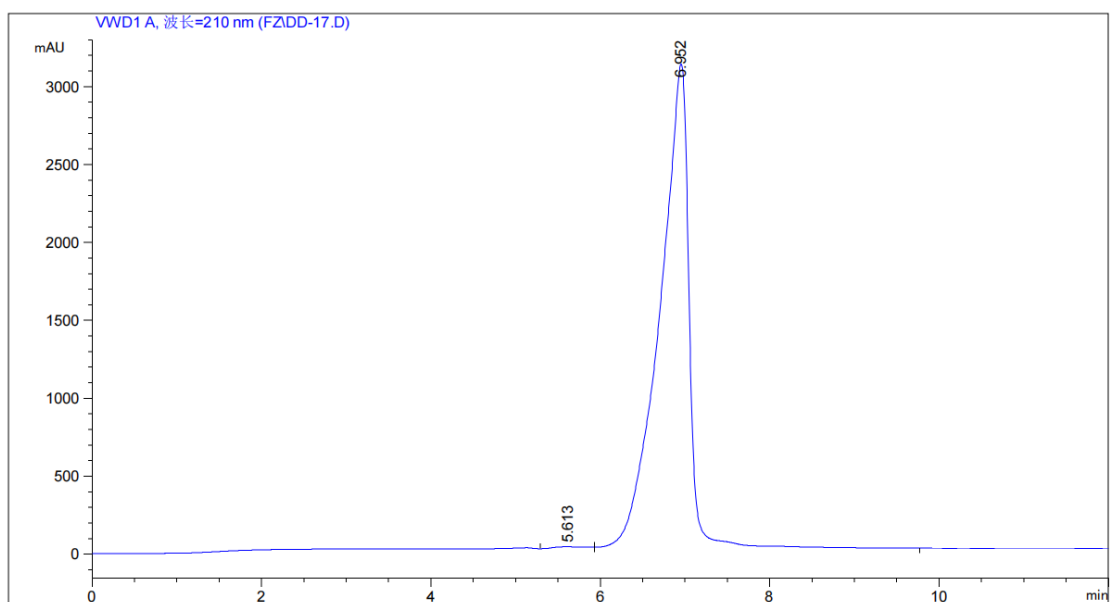

| Peak Retention time | Peak type | Peak width | Peak area | Peak height | Peak area% |
|---------------------|-----------|------------|-----------|-------------|------------|
|---------------------|-----------|------------|-----------|-------------|------------|

| # | [min] |    | [min]  | mAU        | *s | [mAU ]     | %       |
|---|-------|----|--------|------------|----|------------|---------|
| 1 | 5.613 | VV | 0.4863 | 1497.32666 |    | 42.54254   | 1.7895  |
| 2 | 6.952 | VB | 0.3521 | 8.21750e4  |    | 3137.66675 | 98.2105 |

sum : 8.36724e4 3180.20929

#### Compound 6

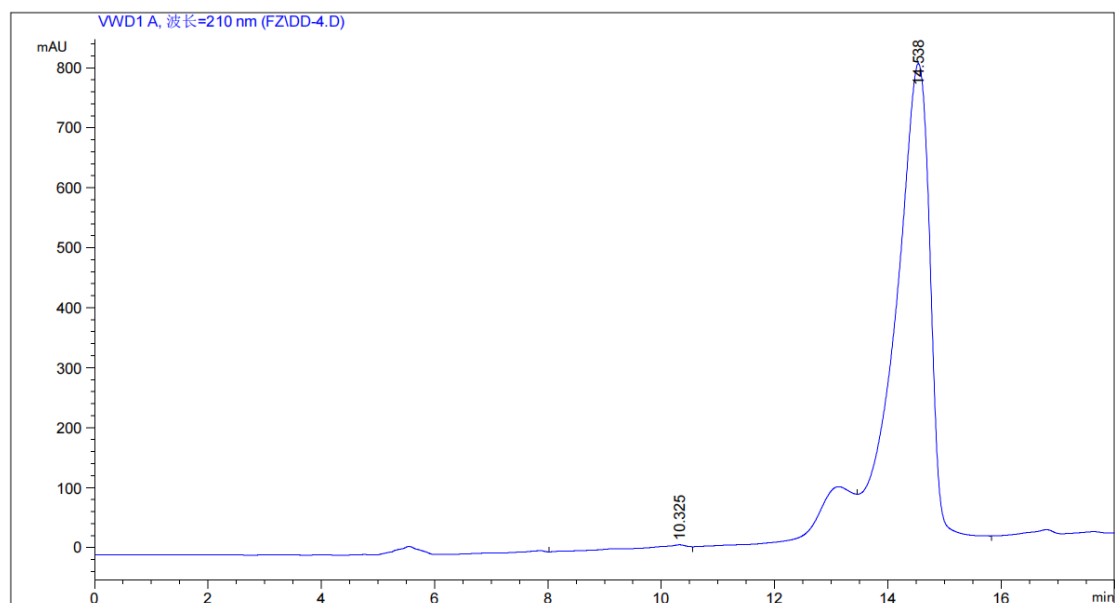

| Peak | Retention time | Peak type | Peak width | Peak area  | Peak height | Peak area% |
|------|----------------|-----------|------------|------------|-------------|------------|
| #    | [min]          |           | [min]      | mAU *s     | [mAU ]      | %          |
| 1    | 10.325         | VV        | 1.1577     | 1638.47131 | 17.20361    | 4.2330     |
| 2    | 14.538         | VB        | 0.6616     | 3.70686e4  | 819.60638   | 95.7670    |

sum : 3.87071e4 836.80999

#### Compound 7

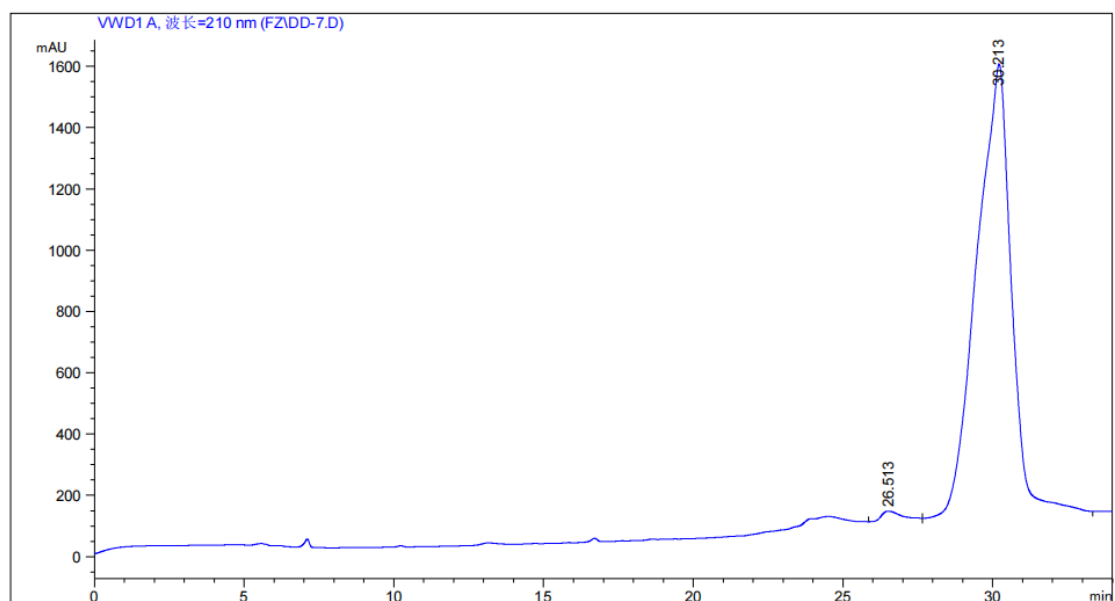

| Peak # | Retention time [min] | Peak type | Peak width [min] | Peak area mAU *s | Peak height [mAU] | Peak area% |
|--------|----------------------|-----------|------------------|------------------|-------------------|------------|
| 1      | 26.513               | VV        | 0.9434           | 3352.33447       | 49.74641          | 2.6536     |
| 2      | 30.213               | VV        | 1.0923           | 1.22977e5        | 1488.04834        | 97.3464    |

sum: 1.26330e5 1537.79475

### Compound 8

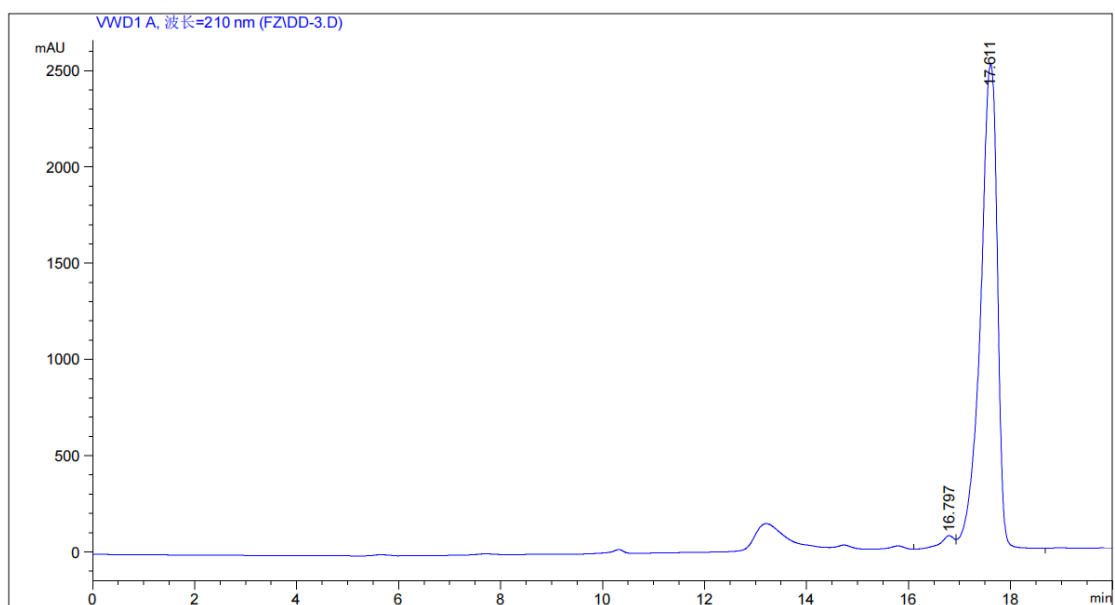

| Peak Retention time | Peak type | Peak width | Peak area | Peak height | Peak area% |
|---------------------|-----------|------------|-----------|-------------|------------|
|---------------------|-----------|------------|-----------|-------------|------------|

| # | [min]  |    | [min]  | mAU        | *s | [mAU ]     | %       |
|---|--------|----|--------|------------|----|------------|---------|
| 1 | 16.797 | VV | 0.3978 | 3117.22534 |    | 105.28576  | 4.7910  |
| 2 | 17.611 | VB | 0.3647 | 6.19464e4  |    | 2552.15552 | 95.2090 |

sum : 6.50637e4 2657.44128

#### Compound 9

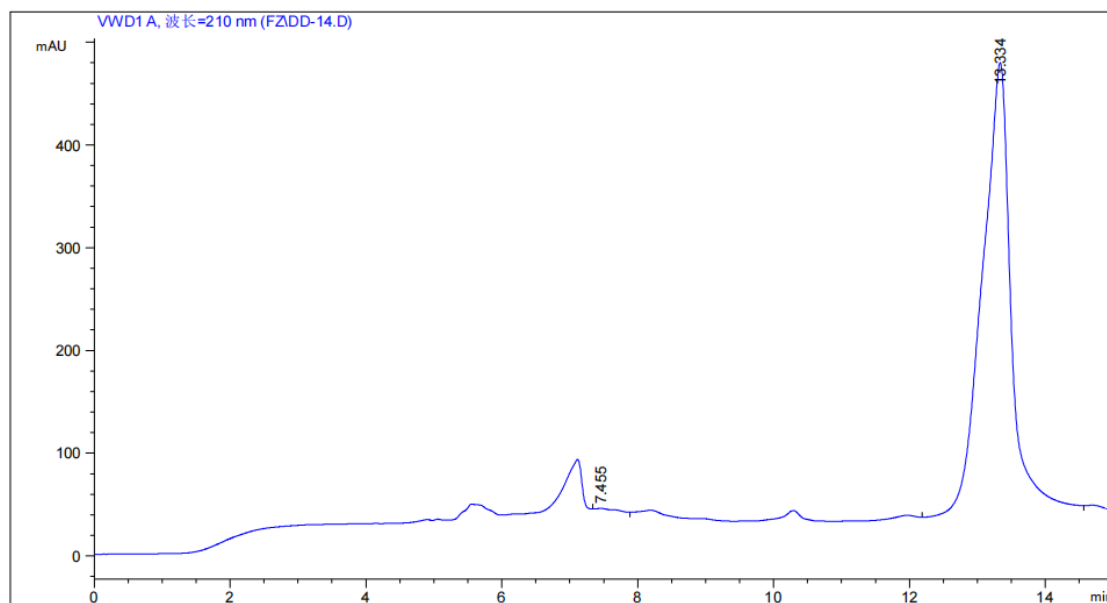

| Peak | Retention time | Peak type | Peak width | Peak area  | Peak height | Peak area% |         |
|------|----------------|-----------|------------|------------|-------------|------------|---------|
| #    | [min]          |           | [min]      | mAU        | *s          | [mAU ]     | %       |
| 1    | 7.455          | VV        | 0.4128     | 1410.47339 |             | 44.23561   | 7.0901  |
| 2    | 13.334         | VV        | 0.5157     | 1.84830e4  |             | 477.47458  | 92.9099 |

sum: 1.98934e4 521.71019

#### Compound 10



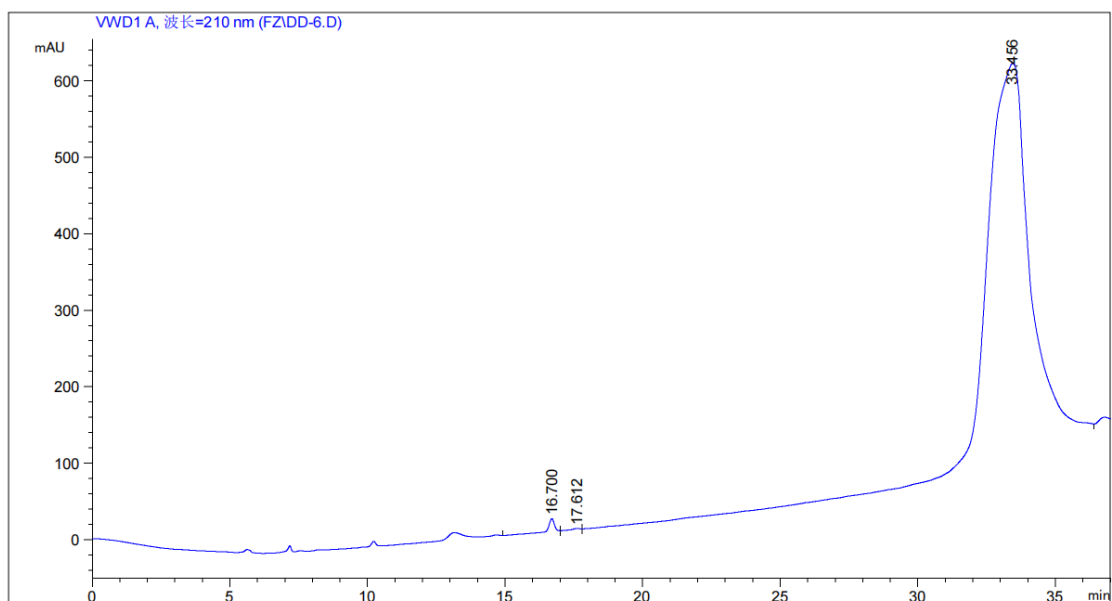

| Peak # | Retention time [min] | Peak type | Peak width [min] | Peak area mAU *s | Peak height [mAU] | Peak area% |
|--------|----------------------|-----------|------------------|------------------|-------------------|------------|
| 1      | 16.700               | VV        | 0.9569           | 3466.27905       | 44.70897          | 2.3467     |
| 2      | 17.612               | VV        | 0.5739           | 1434.41748       | 32.08900          | 0.9711     |
| 3      | 33.456               | VV        | 2.9919           | 1.42808e5        | 638.95795         | 96.6822    |

sum : 1.47709e5 715.75591

### Compound 11

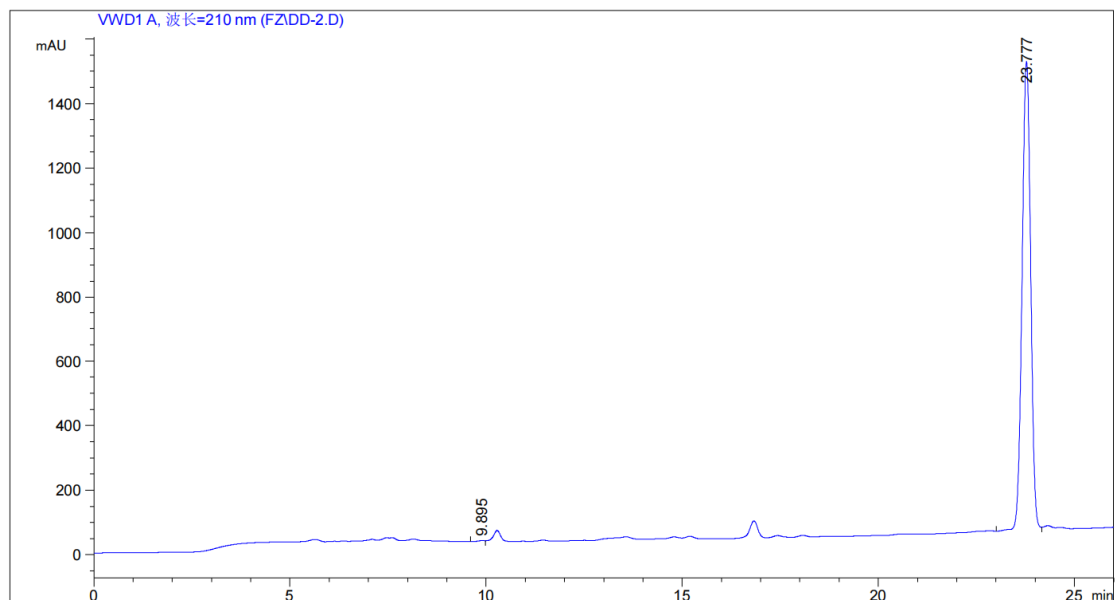

| Peak Retention time | Peak type | Peak width | Peak area | Peak height | Peak area% |
|---------------------|-----------|------------|-----------|-------------|------------|
|---------------------|-----------|------------|-----------|-------------|------------|

| # | [min]  |    | [min]  | mAU       | *s | [mAU]      | ] | %       |
|---|--------|----|--------|-----------|----|------------|---|---------|
| 1 | 9.895  | VV | 0.2970 | 797.91742 |    | 36.32996   |   | 2.8869  |
| 2 | 23.777 | VV | 0.2641 | 2.68411e4 |    | 1520.83435 |   | 97.1131 |

sum : 2.76390e4 1557.16431

**Table S1.** Gibbs free energies<sup>a</sup> and equilibrium populations<sup>b</sup> of low-energy conformers of phaseolorin J (**1**).

| Conformers | In gas           |                      |
|------------|------------------|----------------------|
|            | $G^a$            | $P$ (%) <sup>b</sup> |
| <b>1-1</b> | -694991.07437097 | 49.68                |
| <b>1-2</b> | -694991.07499848 | 49.74                |
| <b>1-3</b> | -694988.43757395 | 0.58                 |

<sup>a</sup>B3LYP/6-31G(d,p), in kcal/mol. <sup>b</sup>From  $G$  values at 298.15K.

**Table S2.** Cartesian coordinates for the low-energy reoptimized MMFF conformers of phaseolorin J (**1**) at B3LYP/6-31G(d,p) level of theory in gas.

Conformer **1-1**

| <b>1-1</b>    |               | Standard Orientation<br>(Ångstroms) |           |           |           |
|---------------|---------------|-------------------------------------|-----------|-----------|-----------|
| Center number | Atomic number | Atomic Type                         | X         | Y         | Z         |
| 1.            | 6.            | 0.                                  | -0.259242 | 4.493108  | -0.793624 |
| 2.            | 6.            | 0.                                  | -0.744437 | 4.403127  | 0.505704  |
| 3.            | 6.            | 0.                                  | -0.861031 | 3.178465  | 1.174015  |
| 4.            | 6.            | 0.                                  | -0.494533 | 2.016384  | 0.508435  |
| 5.            | 6.            | 0.                                  | -0.019896 | 2.062035  | -0.824450 |
| 6.            | 6.            | 0.                                  | 0.115809  | 3.323391  | -1.465967 |
| 7.            | 8.            | 0.                                  | -0.612927 | 0.839636  | 1.199328  |
| 8.            | 6.            | 0.                                  | 0.055840  | -0.342818 | 0.684149  |
| 9.            | 6.            | 0.                                  | -0.194352 | -0.445422 | -0.833875 |
| 10.           | 6.            | 0.                                  | 0.292864  | 0.835299  | -1.524879 |
| 11.           | 6.            | 0.                                  | -0.624762 | -1.529121 | 1.397156  |
| 12.           | 6.            | 0.                                  | -0.297981 | -2.853846 | 0.730658  |
| 13.           | 6.            | 0.                                  | 0.189366  | -2.915321 | -0.516675 |
| 14.           | 6.            | 0.                                  | 0.416679  | -1.736661 | -1.424117 |
| 15.           | 8.            | 0.                                  | 0.802279  | 0.795186  | -2.658322 |
| 16.           | 8.            | 0.                                  | 0.585510  | 3.417113  | -2.717735 |
| 17.           | 8.            | 0.                                  | 1.822916  | -1.631696 | -1.716719 |
| 18.           | 6.            | 0.                                  | -0.583222 | -4.077975 | 1.558167  |
| 19.           | 8.            | 0.                                  | -2.055587 | -1.380578 | 1.411593  |
| 20.           | 6.            | 0.                                  | 1.551409  | -0.317619 | 1.101180  |
| 21.           | 8.            | 0.                                  | 2.421043  | 0.300686  | 0.181051  |

|     |    |    |           |           |           |
|-----|----|----|-----------|-----------|-----------|
| 22. | 8. | 0. | -1.591195 | -0.445138 | -1.124655 |
| 23. | 1. | 0. | -0.156713 | 5.444461  | -1.302309 |
| 24. | 1. | 0. | -1.028654 | 5.312703  | 1.027000  |
| 25. | 1. | 0. | -1.213818 | 3.119808  | 2.196989  |
| 26. | 1. | 0. | -0.264196 | -1.557993 | 2.437891  |
| 27. | 1. | 0. | 0.433211  | -3.884968 | -0.945469 |
| 28. | 1. | 0. | -0.125185 | -1.908151 | -2.362600 |
| 29. | 1. | 0. | 0.812584  | 2.504720  | -3.016365 |
| 30. | 1. | 0. | 1.864837  | -1.012018 | -2.466403 |
| 31. | 1. | 0. | 0.006012  | -4.075056 | 2.483938  |
| 32. | 1. | 0. | -0.357236 | -4.995809 | 1.010329  |
| 33. | 1. | 0. | -1.638514 | -4.099868 | 1.853012  |
| 34. | 1. | 0. | -2.224510 | -0.501552 | 1.788193  |
| 35. | 1. | 0. | 1.869644  | -1.347833 | 1.310348  |
| 36. | 1. | 0. | 1.602348  | 0.244268  | 2.039205  |
| 37. | 1. | 0. | 2.563041  | -0.361688 | -0.521470 |
| 38. | 1. | 0. | -2.056403 | -0.869259 | -0.378706 |

Conformer 1-2

| 1-2              |                | Standard Orientation<br>(Ångstroms) |           |           |           |
|------------------|----------------|-------------------------------------|-----------|-----------|-----------|
| Center<br>number | Atom<br>number | Type                                | X         | Y         | Z         |
| 1.               | 6.             | 0.                                  | -0.293088 | 4.487390  | -0.814041 |
| 2.               | 6.             | 0.                                  | -0.793413 | 4.397416  | 0.479512  |
| 3.               | 6.             | 0.                                  | -0.906486 | 3.174126  | 1.150909  |
| 4.               | 6.             | 0.                                  | -0.520636 | 2.013221  | 0.494270  |
| 5.               | 6.             | 0.                                  | -0.029953 | 2.058589  | -0.832859 |
| 6.               | 6.             | 0.                                  | 0.101517  | 3.318911  | -1.477301 |
| 7.               | 8.             | 0.                                  | -0.636209 | 0.837981  | 1.188119  |
| 8.               | 6.             | 0.                                  | 0.050581  | -0.339653 | 0.685814  |
| 9.               | 6.             | 0.                                  | -0.179934 | -0.450414 | -0.834751 |
| 10.              | 6.             | 0.                                  | 0.303351  | 0.832439  | -1.524701 |
| 11.              | 6.             | 0.                                  | -0.626949 | -1.529840 | 1.395109  |
| 12.              | 6.             | 0.                                  | -0.278930 | -2.853880 | 0.738012  |
| 13.              | 6.             | 0.                                  | 0.223960  | -2.915262 | -0.503149 |
| 14.              | 6.             | 0.                                  | 0.450835  | -1.737963 | -1.412430 |
| 15.              | 8.             | 0.                                  | 0.827269  | 0.792985  | -2.651512 |
| 16.              | 8.             | 0.                                  | 0.585711  | 3.412783  | -2.723524 |
| 17.              | 8.             | 0.                                  | 1.859371  | -1.620485 | -1.688415 |
| 18.              | 6.             | 0.                                  | -0.562000 | -4.077611 | 1.566807  |
| 19.              | 8.             | 0.                                  | -2.059226 | -1.395569 | 1.391258  |
| 20.              | 6.             | 0.                                  | 1.540744  | -0.297918 | 1.120811  |
| 21.              | 8.             | 0.                                  | 2.415447  | 0.324612  | 0.208428  |

|     |    |    |           |           |           |
|-----|----|----|-----------|-----------|-----------|
| 22. | 8. | 0. | -1.573028 | -0.464727 | -1.142612 |
| 23. | 1. | 0. | -0.193428 | 5.437820  | -1.325009 |
| 24. | 1. | 0. | -1.092794 | 5.306103  | 0.993864  |
| 25. | 1. | 0. | -1.271326 | 3.115709  | 2.169653  |
| 26. | 1. | 0. | -0.279021 | -1.550840 | 2.440323  |
| 27. | 1. | 0. | 0.482602  | -3.884020 | -0.925274 |
| 28. | 1. | 0. | -0.077997 | -1.918336 | -2.356684 |
| 29. | 1. | 0. | 0.825217  | 2.501712  | -3.016159 |
| 30. | 1. | 0. | 1.904390  | -1.002902 | -2.439694 |
| 31. | 1. | 0. | 0.015996  | -4.065278 | 2.499554  |
| 32. | 1. | 0. | -0.320360 | -4.995204 | 1.025294  |
| 33. | 1. | 0. | -1.620491 | -4.108827 | 1.849075  |
| 34. | 1. | 0. | -2.241839 | -0.517271 | 1.763113  |
| 35. | 1. | 0. | 1.866361  | -1.324014 | 1.338771  |
| 36. | 1. | 0. | 1.574869  | 0.268807  | 2.056687  |
| 37. | 1. | 0. | 2.572225  | -0.339296 | -0.489563 |
| 38. | 1. | 0. | -2.043334 | -0.890296 | -0.400705 |

Conformer **1-3**

| <b>1-3</b>       |                | Standard Orientation<br>(Ångstroms) |           |           |           |
|------------------|----------------|-------------------------------------|-----------|-----------|-----------|
| Center<br>number | Atom<br>number | Type                                | X         | Y         | Z         |
| 1.               | 6.             | 0.                                  | -0.121899 | 4.487576  | -0.855731 |
| 2.               | 6.             | 0.                                  | -0.573605 | 4.408048  | 0.457698  |
| 3.               | 6.             | 0.                                  | -0.731157 | 3.185861  | 1.119595  |
| 4.               | 6.             | 0.                                  | -0.444353 | 2.010971  | 0.435121  |
| 5.               | 6.             | 0.                                  | -0.003100 | 2.046264  | -0.913335 |
| 6.               | 6.             | 0.                                  | 0.173774  | 3.309080  | -1.549323 |
| 7.               | 8.             | 0.                                  | -0.596634 | 0.838947  | 1.113473  |
| 8.               | 6.             | 0.                                  | 0.043275  | -0.348625 | 0.576366  |
| 9.               | 6.             | 0.                                  | -0.265797 | -0.457575 | -0.932110 |
| 10.              | 6.             | 0.                                  | 0.222469  | 0.813936  | -1.638521 |
| 11.              | 6.             | 0.                                  | -0.615624 | -1.531785 | 1.320705  |
| 12.              | 6.             | 0.                                  | -0.334883 | -2.859973 | 0.645530  |
| 13.              | 6.             | 0.                                  | 0.086042  | -2.931269 | -0.624341 |
| 14.              | 6.             | 0.                                  | 0.318317  | -1.755281 | -1.536084 |
| 15.              | 8.             | 0.                                  | 0.702494  | 0.771336  | -2.785582 |
| 16.              | 8.             | 0.                                  | 0.609876  | 3.390904  | -2.813457 |
| 17.              | 8.             | 0.                                  | 1.718686  | -1.671309 | -1.806559 |
| 18.              | 6.             | 0.                                  | -0.599083 | -4.077702 | 1.489522  |
| 19.              | 8.             | 0.                                  | -2.049495 | -1.367002 | 1.370930  |
| 20.              | 6.             | 0.                                  | 1.548387  | -0.283201 | 0.890515  |
| 21.              | 8.             | 0.                                  | 1.694669  | -0.192401 | 2.303348  |

|     |    |    |           |           |           |
|-----|----|----|-----------|-----------|-----------|
| 22. | 8. | 0. | -1.670776 | -0.430096 | -1.166635 |
| 23. | 1. | 0. | 0.010926  | 5.438091  | -1.358976 |
| 24. | 1. | 0. | -0.796754 | 5.325840  | 0.994203  |
| 25. | 1. | 0. | -1.053153 | 3.133602  | 2.152809  |
| 26. | 1. | 0. | -0.222470 | -1.546822 | 2.343386  |
| 27. | 1. | 0. | 0.295503  | -3.904863 | -1.062521 |
| 28. | 1. | 0. | -0.237139 | -1.915952 | -2.470388 |
| 29. | 1. | 0. | 0.768812  | 2.468898  | -3.130041 |
| 30. | 1. | 0. | 1.800653  | -1.011949 | -2.514528 |
| 31. | 1. | 0. | 0.036219  | -4.082477 | 2.384153  |
| 32. | 1. | 0. | -0.417002 | -5.000218 | 0.932892  |
| 33. | 1. | 0. | -1.638431 | -4.081123 | 1.837231  |
| 34. | 1. | 0. | -2.203267 | -0.517373 | 1.813210  |
| 35. | 1. | 0. | 1.982682  | 0.594570  | 0.391910  |
| 36. | 1. | 0. | 2.036775  | -1.169670 | 0.475923  |
| 37. | 1. | 0. | 2.636848  | -0.252592 | 2.502546  |
| 38. | 1. | 0. | -2.111787 | -0.832665 | -0.392935 |

**Table S3.** Gibbs free energies<sup>a</sup> and equilibrium populations<sup>b</sup> of low-energy conformers of phomoparagin D (**5**).

| Conformers | In gas           |                      |
|------------|------------------|----------------------|
|            | $G^a$            | $P$ (%) <sup>b</sup> |
| <b>5-1</b> | -953546.56610655 | 92.90                |
| <b>5-2</b> | -953544.26251734 | 1.90                 |
| <b>5-3</b> | -953544.85990686 | 5.20                 |

<sup>a</sup>B3LYP/6-31G(d,p), in kcal/mol. <sup>b</sup>From  $G$  values at 298.15K.

**Table S4.** Cartesian coordinates for the low-energy reoptimized MMFF conformers of phomoparagin D (**5**) at B3LYP/6-31G(d,p) level of theory in gas.

Conformer **5-1**

| <b>5-1</b>    |               | Standard Orientation<br>(Ångstroms) |           |           |           |
|---------------|---------------|-------------------------------------|-----------|-----------|-----------|
| Center number | Atomic number | Atomic Type                         | X         | Y         | Z         |
| 1.            | 6.            | 0.                                  | -1.604190 | 2.227710  | 1.437805  |
| 2.            | 6.            | 0.                                  | -1.530347 | 0.707112  | 1.170235  |
| 3.            | 6.            | 0.                                  | -0.176412 | 0.246035  | 0.511293  |
| 4.            | 6.            | 0.                                  | 0.611138  | 1.468136  | -0.079859 |
| 5.            | 6.            | 0.                                  | -0.357283 | 2.455913  | -0.795094 |
| 6.            | 6.            | 0.                                  | -1.433014 | 2.995226  | 0.141234  |
| 7.            | 6.            | 0.                                  | -2.137023 | 4.076462  | -0.202232 |
| 8.            | 8.            | 0.                                  | 0.346427  | 3.565082  | -1.335655 |
| 9.            | 6.            | 0.                                  | -2.839407 | 2.623964  | 2.253757  |
| 10.           | 6.            | 0.                                  | -2.677734 | 0.173093  | 0.257223  |
| 11.           | 7.            | 0.                                  | -1.978392 | -0.680452 | -0.691083 |

|     |    |    |           |           |           |
|-----|----|----|-----------|-----------|-----------|
| 12. | 6. | 0. | -0.625850 | -0.728396 | -0.598433 |
| 13. | 6. | 0. | 0.649254  | -0.529942 | 1.579284  |
| 14. | 6. | 0. | -3.773223 | -0.605369 | 1.021452  |
| 15. | 6. | 0. | -4.849648 | -1.164309 | 0.115134  |
| 16. | 6. | 0. | -5.894631 | -0.349180 | -0.344540 |
| 17. | 6. | 0. | -6.864191 | -0.849438 | -1.212744 |
| 18. | 6. | 0. | -6.806241 | -2.178137 | -1.638825 |
| 19. | 6. | 0. | -5.774287 | -3.001321 | -1.188262 |
| 20. | 6. | 0. | -4.805219 | -2.496850 | -0.318425 |
| 21. | 8. | 0. | 1.100051  | 0.403034  | 2.545376  |
| 22. | 8. | 0. | 0.102659  | -1.433673 | -1.290748 |
| 23. | 1. | 0. | -1.614314 | 0.209122  | 2.141758  |
| 24. | 1. | 0. | 1.041597  | 2.002082  | 0.772310  |
| 25. | 6. | 0. | 1.798577  | -1.430759 | 1.126679  |
| 26. | 6. | 0. | 3.204378  | -1.025410 | 1.084187  |
| 27. | 6. | 0. | 1.738981  | 1.114006  | -1.018016 |
| 28. | 6. | 0. | 2.965156  | 1.643969  | -0.916075 |
| 29. | 6. | 0. | 4.146325  | 1.326251  | -1.789136 |
| 30. | 6. | 0. | 4.283717  | -1.761132 | 0.288387  |
| 31. | 6. | 0. | 4.502097  | -1.119227 | -1.094755 |
| 32. | 6. | 0. | 5.111784  | 0.309961  | -1.120906 |
| 33. | 6. | 0. | 6.477331  | 0.309334  | -1.823581 |
| 34. | 8. | 0. | 5.520071  | -1.613440 | 1.008781  |
| 35. | 6. | 0. | 3.968592  | -3.254635 | 0.121488  |
| 36. | 8. | 0. | 2.685037  | -1.742113 | 2.239478  |
| 37. | 1. | 0. | -0.728449 | 2.447765  | 2.065013  |
| 38. | 1. | 0. | -0.851530 | 1.900464  | -1.613609 |
| 39. | 1. | 0. | -1.930363 | 4.597907  | -1.130388 |
| 40. | 1. | 0. | -2.912495 | 4.491413  | 0.432646  |
| 41. | 1. | 0. | 1.117907  | 3.203275  | -1.798562 |
| 42. | 1. | 0. | -2.909677 | 2.017836  | 3.162687  |
| 43. | 1. | 0. | -3.767025 | 2.497985  | 1.685053  |
| 44. | 1. | 0. | -2.784472 | 3.672179  | 2.560697  |
| 45. | 1. | 0. | -3.154818 | 1.005721  | -0.277461 |
| 46. | 1. | 0. | -2.460974 | -1.243900 | -1.378248 |
| 47. | 1. | 0. | -0.064494 | -1.230528 | 2.051987  |
| 48. | 1. | 0. | -3.294329 | -1.417709 | 1.580321  |
| 49. | 1. | 0. | -4.218242 | 0.073207  | 1.757272  |
| 50. | 1. | 0. | -5.951315 | 0.685173  | -0.013722 |
| 51. | 1. | 0. | -7.667920 | -0.203246 | -1.553744 |
| 52. | 1. | 0. | -7.562865 | -2.569005 | -2.312578 |
| 53. | 1. | 0. | -5.724236 | -4.038071 | -1.508310 |
| 54. | 1. | 0. | -4.010025 | -3.147167 | 0.037783  |

|     |    |    |          |           |           |
|-----|----|----|----------|-----------|-----------|
| 55. | 1. | 0. | 1.734660 | -0.090650 | 3.092474  |
| 56. | 1. | 0. | 1.489361 | -2.292159 | 0.544018  |
| 57. | 1. | 0. | 3.439998 | 0.012678  | 1.305206  |
| 58. | 1. | 0. | 1.510233 | 0.428437  | -1.831384 |
| 59. | 1. | 0. | 3.169125 | 2.312489  | -0.077083 |
| 60. | 1. | 0. | 4.699493 | 2.251029  | -1.999115 |
| 61. | 1. | 0. | 3.816814 | 0.926789  | -2.756767 |
| 62. | 1. | 0. | 5.163162 | -1.794274 | -1.650450 |
| 63. | 1. | 0. | 3.537723 | -1.140029 | -1.613643 |
| 64. | 1. | 0. | 5.284958 | 0.634229  | -0.087898 |
| 65. | 1. | 0. | 7.160214 | -0.387735 | -1.328802 |
| 66. | 1. | 0. | 6.382341 | 0.002208  | -2.872577 |
| 67. | 1. | 0. | 6.935943 | 1.304159  | -1.807335 |
| 68. | 1. | 0. | 5.384389 | -2.003852 | 1.883861  |
| 69. | 1. | 0. | 3.708898 | -3.706814 | 1.083058  |
| 70. | 1. | 0. | 4.854513 | -3.755939 | -0.275906 |
| 71. | 1. | 0. | 3.139222 | -3.421431 | -0.572491 |

Conformer 5-2

| 5-2              |                | Standard Orientation<br>(Ångstroms) |           |           |           |
|------------------|----------------|-------------------------------------|-----------|-----------|-----------|
| Center<br>number | Atom<br>number | Type                                | X         | Y         | Z         |
| 1.               | 6.             | 0.                                  | 2.133490  | 1.557655  | -0.902245 |
| 2.               | 6.             | 0.                                  | 1.767212  | 0.261667  | -0.126510 |
| 3.               | 6.             | 0.                                  | 0.232245  | 0.167813  | 0.239773  |
| 4.               | 6.             | 0.                                  | -0.550588 | 1.428748  | -0.256781 |
| 5.               | 6.             | 0.                                  | 0.154110  | 2.744822  | 0.186772  |
| 6.               | 6.             | 0.                                  | 1.646654  | 2.752177  | -0.117698 |
| 7.               | 6.             | 0.                                  | 2.413685  | 3.758050  | 0.308711  |
| 8.               | 8.             | 0.                                  | -0.424440 | 3.859449  | -0.487721 |
| 9.               | 6.             | 0.                                  | 3.599551  | 1.612853  | -1.337582 |
| 10.              | 6.             | 0.                                  | 2.545381  | 0.097406  | 1.220071  |
| 11.              | 7.             | 0.                                  | 1.492670  | 0.149780  | 2.224516  |
| 12.              | 6.             | 0.                                  | 0.212657  | 0.085350  | 1.778240  |
| 13.              | 6.             | 0.                                  | -0.314910 | -1.162235 | -0.354639 |
| 14.              | 6.             | 0.                                  | 3.348176  | -1.224322 | 1.355302  |
| 15.              | 6.             | 0.                                  | 4.578081  | -1.312423 | 0.479601  |
| 16.              | 6.             | 0.                                  | 4.574277  | -2.056616 | -0.707282 |
| 17.              | 6.             | 0.                                  | 5.707743  | -2.115597 | -1.520601 |
| 18.              | 6.             | 0.                                  | 6.867288  | -1.430844 | -1.156719 |
| 19.              | 6.             | 0.                                  | 6.888473  | -0.692982 | 0.028693  |
| 20.              | 6.             | 0.                                  | 5.754474  | -0.637845 | 0.838107  |
| 21.              | 8.             | 0.                                  | -0.339943 | -1.029106 | -1.764943 |

|     |    |    |           |           |           |
|-----|----|----|-----------|-----------|-----------|
| 22. | 8. | 0. | -0.779204 | -0.013468 | 2.494317  |
| 23. | 1. | 0. | 2.018283  | -0.573425 | -0.785271 |
| 24. | 1. | 0. | -0.520485 | 1.403196  | -1.349907 |
| 25. | 6. | 0. | -1.638636 | -1.725951 | 0.157031  |
| 26. | 6. | 0. | -2.918151 | -1.572078 | -0.537413 |
| 27. | 6. | 0. | -1.998087 | 1.521636  | 0.160195  |
| 28. | 6. | 0. | -3.000217 | 1.750651  | -0.699018 |
| 29. | 6. | 0. | -4.455168 | 1.894298  | -0.342172 |
| 30. | 6. | 0. | -4.286668 | -1.787617 | 0.108111  |
| 31. | 6. | 0. | -4.911745 | -0.460174 | 0.572343  |
| 32. | 6. | 0. | -5.261812 | 0.580373  | -0.527597 |
| 33. | 6. | 0. | -6.770423 | 0.868092  | -0.546727 |
| 34. | 8. | 0. | -5.156321 | -2.310561 | -0.911775 |
| 35. | 6. | 0. | -4.230460 | -2.774216 | 1.282790  |
| 36. | 8. | 0. | -2.124806 | -2.776759 | -0.726133 |
| 37. | 1. | 0. | 1.539173  | 1.515994  | -1.825547 |
| 38. | 1. | 0. | 0.014834  | 2.857121  | 1.275400  |
| 39. | 1. | 0. | 1.988770  | 4.581622  | 0.874896  |
| 40. | 1. | 0. | 3.473735  | 3.816232  | 0.085264  |
| 41. | 1. | 0. | -1.385582 | 3.763409  | -0.393376 |
| 42. | 1. | 0. | 3.860216  | 0.728428  | -1.925510 |
| 43. | 1. | 0. | 4.292889  | 1.658124  | -0.492749 |
| 44. | 1. | 0. | 3.774575  | 2.496908  | -1.958068 |
| 45. | 1. | 0. | 3.229328  | 0.941064  | 1.368979  |
| 46. | 1. | 0. | 1.675135  | 0.075217  | 3.216257  |
| 47. | 1. | 0. | 0.424032  | -1.936820 | -0.074333 |
| 48. | 1. | 0. | 3.649971  | -1.322051 | 2.406620  |
| 49. | 1. | 0. | 2.673188  | -2.062403 | 1.147355  |
| 50. | 1. | 0. | 3.678938  | -2.602686 | -0.993438 |
| 51. | 1. | 0. | 5.684721  | -2.700710 | -2.435421 |
| 52. | 1. | 0. | 7.750379  | -1.477663 | -1.786935 |
| 53. | 1. | 0. | 7.790148  | -0.165104 | 0.325636  |
| 54. | 1. | 0. | 5.783546  | -0.068962 | 1.764699  |
| 55. | 1. | 0. | -0.780513 | -1.834041 | -2.085060 |
| 56. | 1. | 0. | -1.643108 | -1.986991 | 1.210956  |
| 57. | 1. | 0. | -2.935841 | -0.937927 | -1.419789 |
| 58. | 1. | 0. | -2.197524 | 1.467556  | 1.228483  |
| 59. | 1. | 0. | -2.770653 | 1.775154  | -1.766316 |
| 60. | 1. | 0. | -4.901748 | 2.672385  | -0.974869 |
| 61. | 1. | 0. | -4.563209 | 2.232975  | 0.696232  |
| 62. | 1. | 0. | -5.827778 | -0.724149 | 1.113327  |
| 63. | 1. | 0. | -4.233963 | -0.024828 | 1.314505  |
| 64. | 1. | 0. | -5.006132 | 0.156829  | -1.506055 |



|     |    |    |           |           |           |
|-----|----|----|-----------|-----------|-----------|
| 65. | 1. | 0. | -7.034035 | 1.564905  | -1.349933 |
| 66. | 1. | 0. | -7.333917 | -0.057036 | -0.700909 |
| 67. | 1. | 0. | -7.100769 | 1.311022  | 0.401087  |
| 68. | 1. | 0. | -4.757123 | -3.134392 | -1.225885 |
| 69. | 1. | 0. | -5.251897 | -3.026511 | 1.578197  |
| 70. | 1. | 0. | -3.710939 | -3.692410 | 0.993527  |
| 71. | 1. | 0. | -3.717417 | -2.347091 | 2.149835  |

Conformer 5-3

| 5-3              |                | Standard Orientation<br>(Ångstroms) |           |           |           |
|------------------|----------------|-------------------------------------|-----------|-----------|-----------|
| Center<br>number | Atom<br>number | Type                                | X         | Y         | Z         |
| 1.               | 6.             | 0.                                  | 2.141018  | 2.280959  | -1.153508 |
| 2.               | 6.             | 0.                                  | 2.058758  | 0.951238  | -0.368058 |
| 3.               | 6.             | 0.                                  | 0.591100  | 0.546251  | 0.040702  |
| 4.               | 6.             | 0.                                  | -0.399253 | 1.751291  | -0.139913 |
| 5.               | 6.             | 0.                                  | 0.239098  | 3.075465  | 0.372898  |
| 6.               | 6.             | 0.                                  | 1.546956  | 3.409818  | -0.336020 |
| 7.               | 6.             | 0.                                  | 2.079942  | 4.628075  | -0.215074 |
| 8.               | 8.             | 0.                                  | -0.644848 | 4.173818  | 0.194015  |
| 9.               | 6.             | 0.                                  | 3.547076  | 2.557259  | -1.696075 |
| 10.              | 6.             | 0.                                  | 2.908235  | 0.948928  | 0.941410  |
| 11.              | 7.             | 0.                                  | 1.980159  | 0.438993  | 1.938270  |
| 12.              | 6.             | 0.                                  | 0.719620  | 0.149041  | 1.524559  |
| 13.              | 6.             | 0.                                  | 0.179268  | -0.695118 | -0.803377 |
| 14.              | 6.             | 0.                                  | 4.224777  | 0.125020  | 0.887364  |
| 15.              | 6.             | 0.                                  | 4.089266  | -1.328371 | 0.487629  |
| 16.              | 6.             | 0.                                  | 3.669733  | -2.299783 | 1.408940  |
| 17.              | 6.             | 0.                                  | 3.528699  | -3.635126 | 1.031392  |
| 18.              | 6.             | 0.                                  | 3.811901  | -4.028217 | -0.277887 |
| 19.              | 6.             | 0.                                  | 4.242589  | -3.077082 | -1.202994 |
| 20.              | 6.             | 0.                                  | 4.380652  | -1.741806 | -0.820580 |
| 21.              | 8.             | 0.                                  | -0.005311 | -0.263877 | -2.142259 |
| 22.              | 8.             | 0.                                  | -0.156817 | -0.333768 | 2.234949  |
| 23.              | 1.             | 0.                                  | 2.443311  | 0.169177  | -1.026748 |
| 24.              | 1.             | 0.                                  | -0.557030 | 1.863129  | -1.216580 |
| 25.              | 6.             | 0.                                  | -1.002895 | -1.549606 | -0.347946 |
| 26.              | 6.             | 0.                                  | -2.371516 | -1.405733 | -0.846989 |
| 27.              | 6.             | 0.                                  | -1.752120 | 1.581751  | 0.507316  |
| 28.              | 6.             | 0.                                  | -2.905690 | 1.805366  | -0.135899 |
| 29.              | 6.             | 0.                                  | -4.285361 | 1.643969  | 0.438105  |
| 30.              | 6.             | 0.                                  | -3.606044 | -1.966702 | -0.140020 |
| 31.              | 6.             | 0.                                  | -4.283600 | -0.904965 | 0.746451  |

|     |    |    |           |           |           |
|-----|----|----|-----------|-----------|-----------|
| 32. | 6. | 0. | -4.945856 | 0.301131  | 0.024227  |
| 33. | 6. | 0. | -6.458272 | 0.333208  | 0.289465  |
| 34. | 8. | 0. | -4.558718 | -2.317875 | -1.159645 |
| 35. | 6. | 0. | -3.281863 | -3.210696 | 0.699733  |
| 36. | 8. | 0. | -1.482012 | -2.399114 | -1.429319 |
| 37. | 1. | 0. | 1.488904  | 2.133914  | -2.026183 |
| 38. | 1. | 0. | 0.450169  | 2.945131  | 1.450346  |
| 39. | 1. | 0. | 1.575125  | 5.397461  | 0.359153  |
| 40. | 1. | 0. | 3.008036  | 4.907841  | -0.701896 |
| 41. | 1. | 0. | -1.514522 | 3.881731  | 0.508645  |
| 42. | 1. | 0. | 3.910950  | 1.700632  | -2.272654 |
| 43. | 1. | 0. | 4.266091  | 2.761114  | -0.895212 |
| 44. | 1. | 0. | 3.545109  | 3.424588  | -2.362274 |
| 45. | 1. | 0. | 3.190352  | 1.978731  | 1.200193  |
| 46. | 1. | 0. | 2.232457  | 0.283295  | 2.904538  |
| 47. | 1. | 0. | 1.039912  | -1.385191 | -0.755792 |
| 48. | 1. | 0. | 4.901088  | 0.635777  | 0.194101  |
| 49. | 1. | 0. | 4.696328  | 0.192747  | 1.876833  |
| 50. | 1. | 0. | 3.455906  | -2.010695 | 2.433940  |
| 51. | 1. | 0. | 3.202319  | -4.369498 | 1.762049  |
| 52. | 1. | 0. | 3.704999  | -5.068127 | -0.571672 |
| 53. | 1. | 0. | 4.476072  | -3.372988 | -2.221627 |
| 54. | 1. | 0. | 4.728543  | -1.010122 | -1.545613 |
| 55. | 1. | 0. | -0.394526 | -1.028643 | -2.599002 |
| 56. | 1. | 0. | -0.845112 | -2.069042 | 0.591643  |
| 57. | 1. | 0. | -2.579390 | -0.580992 | -1.523851 |
| 58. | 1. | 0. | -1.764648 | 1.309065  | 1.560582  |
| 59. | 1. | 0. | -2.864692 | 2.056637  | -1.197779 |
| 60. | 1. | 0. | -4.919798 | 2.469435  | 0.089322  |
| 61. | 1. | 0. | -4.257012 | 1.706780  | 1.533474  |
| 62. | 1. | 0. | -5.049173 | -1.430202 | 1.329156  |
| 63. | 1. | 0. | -3.533048 | -0.562100 | 1.466914  |
| 64. | 1. | 0. | -4.815146 | 0.175808  | -1.057120 |
| 65. | 1. | 0. | -6.941827 | 1.155395  | -0.249493 |
| 66. | 1. | 0. | -6.921961 | -0.603608 | -0.033839 |
| 67. | 1. | 0. | -6.669621 | 0.463829  | 1.358048  |
| 68. | 1. | 0. | -4.130188 | -2.971672 | -1.730192 |
| 69. | 1. | 0. | -2.704498 | -2.959708 | 1.594755  |
| 70. | 1. | 0. | -4.220312 | -3.673331 | 1.014996  |
| 71. | 1. | 0. | -2.709952 | -3.936108 | 0.113903  |

**Table S5.** The calculated  $^{13}\text{C}$  NMR data for isomers of phaseolorin J (**1**)

| no. | $\delta_{\text{exp}}$ | $\delta_{\text{cal}}$ |                | $\delta_{\text{scal}}$ |                | corrected error |                |
|-----|-----------------------|-----------------------|----------------|------------------------|----------------|-----------------|----------------|
|     |                       | <b>1</b>              | <i>8-epi-1</i> | <b>1</b>               | <i>8-epi-1</i> | <b>1</b>        | <i>8-epi-1</i> |
| 1   | 163.2                 | 173.0                 | 173.0          | 165.7                  | 165.3          | 2.5             | 2.1            |
| 2   | 109.3                 | 114.8                 | 113.2          | 108.6                  | 107.3          | -0.7            | -2.0           |
| 3   | 138.9                 | 144.0                 | 145.2          | 137.3                  | 138.3          | -1.6            | -0.6           |
| 4   | 108.7                 | 109.2                 | 110.3          | 103.2                  | 104.5          | -5.5            | -4.2           |
| 4a  | 160.8                 | 167.4                 | 169.1          | 160.3                  | 161.6          | -0.5            | 0.8            |
| 5   | 74.3                  | 78.0                  | 76.7           | 72.5                   | 71.7           | -1.8            | -2.6           |
| 6   | 140.5                 | 146.6                 | 153.0          | 139.8                  | 146.0          | -0.7            | 5.5            |
| 7   | 122.3                 | 133.9                 | 127.5          | 127.4                  | 121.1          | 5.1             | -1.2           |
| 8   | 67.9                  | 76.7                  | 74.4           | 71.2                   | 69.6           | 3.3             | 1.7            |
| 8a  | 74.5                  | 77.5                  | 77.9           | 72.0                   | 72.9           | -2.5            | -1.6           |
| 9   | 197.2                 | 205.4                 | 205.0          | 197.6                  | 196.4          | 0.4             | -0.8           |
| 9a  | 108.4                 | 113.1                 | 111.2          | 106.9                  | 105.2          | -1.5            | -3.2           |
| 10a | 86.5                  | 93.0                  | 91.8           | 87.2                   | 86.4           | 0.7             | -0.1           |
| 11  | 19.2                  | 24.0                  | 23.2           | 19.5                   | 19.7           | 0.3             | 0.5            |
| 12  | 64.1                  | 72.0                  | 74.7           | 66.6                   | 69.8           | 2.5             | 5.7            |

**Table S6.** DFT-optimized structures and thermodynamic parameters for low-energy conformers of **1**.

| Conformers                                         | Conf. A                                                                           | Conf. B                                                                            | Conf. C                                                                             |
|----------------------------------------------------|-----------------------------------------------------------------------------------|------------------------------------------------------------------------------------|-------------------------------------------------------------------------------------|
| DFT-optimized structures                           | 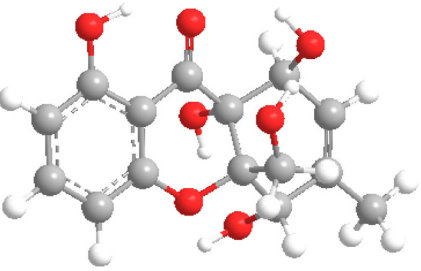 |  |  |
| Population                                         | 48.53%                                                                            | 48.53%                                                                             | 2.94%                                                                               |
| Total energy (a.u.)                                | -1107.75139664                                                                    | -1107.75139657                                                                     | -1107.74875446                                                                      |
| Sum of electronic and zero-point energies (a.u.)   | -1107.449975                                                                      | -1107.449976                                                                       | -1107.448173                                                                        |
| Sum of electronic and thermal energies (a.u.)      | -1107.431472                                                                      | -1107.431474                                                                       | -1107.429249                                                                        |
| Sum of electronic and thermal enthalpies (a.u.)    | -1107.430528                                                                      | -1107.430529                                                                       | -1107.428305                                                                        |
| Sum of electronic and thermal free energies (a.u.) | -1107.494222                                                                      | -1107.494223                                                                       | -1107.492928                                                                        |

**Table S7.** DFT-optimized structures and thermodynamic parameters for low-energy conformers of 8-*epi*-1.

| Conformers                                         | Conf. A                                                                           | Conf. B                                                                            |
|----------------------------------------------------|-----------------------------------------------------------------------------------|------------------------------------------------------------------------------------|
| DFT-optimized structures                           | 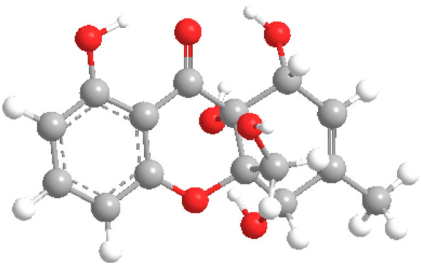 |  |
| Population                                         | 5.13%                                                                             | 94.87%                                                                             |
| Total energy (a.u.)                                | -1107.74778988                                                                    | -1107.75054174                                                                     |
| Sum of electronic and zero-point energies (a.u.)   | -1107.447238                                                                      | -1107.449580                                                                       |
| Sum of electronic and thermal energies (a.u.)      | -1107.428344                                                                      | -1107.430830                                                                       |
| Sum of electronic and thermal enthalpies (a.u.)    | -1107.427399                                                                      | -1107.429886                                                                       |
| Sum of electronic and thermal free energies (a.u.) | -1107.492019                                                                      | -1107.494259                                                                       |

**Table S8.** Optimized Z-matrixes of **1** in the gas phase (Å) at B3LYP/6-31G(d) level.

| Conf. A |          |          |          | Conf. B |          |          |          | Conf. C |          |          |          |
|---------|----------|----------|----------|---------|----------|----------|----------|---------|----------|----------|----------|
| C       | -4.236   | -0.536   | -0.08487 | C       | -4.23596 | -0.53598 | -0.08464 | C       | -4.26519 | -0.45983 | -0.12029 |
| C       | -3.84304 | -1.84472 | 0.170022 | C       | -3.84294 | -1.8447  | 0.170173 | C       | -3.84994 | -1.7849  | -0.18463 |
| C       | -2.49582 | -2.20659 | 0.290116 | C       | -2.49574 | -2.20661 | 0.290019 | C       | -2.49589 | -2.14042 | -0.18446 |
| C       | -1.52385 | -1.22766 | 0.132729 | C       | -1.52374 | -1.22773 | 0.132434 | C       | -1.53889 | -1.13437 | -0.13828 |
| C       | -1.88083 | 0.112434 | -0.15322 | C       | -1.88076 | 0.112417 | -0.15341 | C       | -1.91842 | 0.230954 | -0.09686 |
| C       | -3.25813 | 0.4543   | -0.2391  | C       | -3.25809 | 0.454311 | -0.239   | C       | -3.30476 | 0.557482 | -0.06896 |
| O       | -0.21869 | -1.62135 | 0.268466 | O       | -0.2186  | -1.62138 | 0.268002 | O       | -0.22678 | -1.52528 | -0.11096 |
| C       | 0.802458 | -0.60333 | 0.444643 | C       | 0.802407 | -0.60326 | 0.444549 | C       | 0.782259 | -0.53818 | 0.268063 |
| C       | 0.562565 | 0.533509 | -0.56876 | C       | 0.562588 | 0.533449 | -0.56902 | C       | 0.509271 | 0.790094 | -0.45978 |
| C       | -0.85007 | 1.103151 | -0.38036 | C       | -0.8501  | 1.1031   | -0.38072 | C       | -0.90859 | 1.271072 | -0.12938 |
| C       | 2.132758 | -1.31123 | 0.115701 | C       | 2.132726 | -1.31114 | 0.115972 | C       | 2.123004 | -1.12603 | -0.21926 |
| C       | 3.265598 | -0.32152 | -0.0903  | C       | 3.265602 | -0.32144 | -0.09012 | C       | 3.234003 | -0.09474 | -0.20769 |
| C       | 3.032842 | 0.975997 | -0.33485 | C       | 3.032825 | 0.976    | -0.33511 | C       | 2.972633 | 1.218379 | -0.1628  |
| C       | 1.675099 | 1.604506 | -0.49572 | C       | 1.675083 | 1.604484 | -0.49588 | C       | 1.598907 | 1.834815 | -0.12664 |
| O       | -1.07485 | 2.315122 | -0.54089 | O       | -1.07482 | 2.31511  | -0.541   | O       | -1.16498 | 2.478326 | 0.01313  |
| O       | -3.6499  | 1.714366 | -0.48215 | O       | -3.64981 | 1.714406 | -0.4819  | O       | -3.71848 | 1.830515 | -0.00611 |
| O       | 1.478038 | 2.574437 | 0.551933 | O       | 1.478089 | 2.57422  | 0.552011 | O       | 1.418231 | 2.438339 | 1.155091 |
| C       | 4.652054 | -0.90465 | -0.02333 | C       | 4.652078 | -0.90445 | -0.02282 | C       | 4.630995 | -0.65112 | -0.28202 |
| O       | 2.018287 | -2.11072 | -1.07617 | O       | 2.018449 | -2.11082 | -1.0758  | O       | 2.008362 | -1.62284 | -1.57174 |
| C       | 0.84154  | -0.15703 | 1.932192 | C       | 0.841086 | -0.15691 | 1.932195 | C       | 0.763921 | -0.44914 | 1.811867 |
| O       | 0.521085 | 0.029645 | -1.90394 | O       | 0.521166 | 0.029345 | -1.90411 | O       | 0.453341 | 0.601643 | -1.87257 |
| O       | 0.022654 | 0.94536  | 2.249675 | O       | 0.022367 | 0.945573 | 2.249538 | O       | 0.946475 | -1.72771 | 2.398344 |
| H       | -5.28065 | -0.25606 | -0.16276 | H       | -5.28061 | -0.25604 | -0.16235 | H       | -5.31485 | -0.18845 | -0.10683 |
| H       | -4.60421 | -2.61015 | 0.295725 | H       | -4.60412 | -2.61012 | 0.296003 | H       | -4.59814 | -2.5721  | -0.22145 |
| H       | -2.19799 | -3.22421 | 0.517124 | H       | -2.19785 | -3.22423 | 0.517003 | H       | -2.18093 | -3.17794 | -0.21149 |
| H       | 2.388146 | -1.97563 | 0.95688  | H       | 2.387955 | -1.9754  | 0.957309 | H       | 2.385955 | -1.95964 | 0.443533 |
| H       | 3.874837 | 1.655987 | -0.45115 | H       | 3.874782 | 1.656012 | -0.45158 | H       | 3.798475 | 1.926755 | -0.13297 |
| H       | 1.641332 | 2.125118 | -1.46105 | H       | 1.641177 | 2.125264 | -1.46112 | H       | 1.528411 | 2.59646  | -0.91573 |
| H       | -2.83627 | 2.272762 | -0.54051 | H       | -2.83615 | 2.272754 | -0.54055 | H       | -2.91318 | 2.404623 | 0.033331 |
| H       | 0.693907 | 3.080239 | 0.26081  | H       | 0.693788 | 3.079955 | 0.261221 | H       | 0.604307 | 2.967516 | 1.075208 |

|   |          |          |          |   |          |          |          |   |          |          |          |
|---|----------|----------|----------|---|----------|----------|----------|---|----------|----------|----------|
| H | 5.417269 | -0.14552 | -0.20888 | H | 5.417254 | -0.14528 | -0.20835 | H | 5.379463 | 0.146083 | -0.30954 |
| H | 4.845172 | -1.35494 | 0.959807 | H | 4.845009 | -1.35455 | 0.960443 | H | 4.844796 | -1.29508 | 0.581523 |
| H | 4.767431 | -1.70272 | -0.76705 | H | 4.767666 | -1.70267 | -0.76635 | H | 4.750353 | -1.27002 | -1.17989 |
| H | 1.242266 | -2.68299 | -0.93231 | H | 1.242329 | -2.68302 | -0.93221 | H | 1.287576 | -2.27703 | -1.5565  |
| H | 0.493715 | -1.00945 | 2.524419 | H | 0.492854 | -1.00928 | 2.524254 | H | 1.575948 | 0.187022 | 2.161666 |
| H | 1.886385 | 0.040486 | 2.2094   | H | 1.885918 | 0.04029  | 2.209743 | H | -0.17784 | 0.009213 | 2.145197 |
| H | 1.119196 | -0.74507 | -1.95315 | H | 1.119601 | -0.74514 | -1.95331 | H | 1.06526  | -0.13024 | -2.10096 |
| H | 0.513357 | 1.730239 | 1.927883 | H | 0.513248 | 1.730504 | 1.928138 | H | 0.235134 | -2.29554 | 2.059964 |

**Table S9.** Optimized Z-matrixes of 8-*epi*-1 in the gas phase (Å) at B3LYP/6-31G(d) level.

| Conf. A |          |          |          | Conf. B |          |          |          |
|---------|----------|----------|----------|---------|----------|----------|----------|
| C       | -4.24481 | -0.45096 | -0.28011 | C       | -4.2409  | -0.44291 | -0.28124 |
| C       | -3.86676 | -1.79076 | -0.31712 | C       | -3.86501 | -1.78265 | -0.33534 |
| C       | -2.53077 | -2.19149 | -0.22921 | C       | -2.52962 | -2.18771 | -0.25391 |
| C       | -1.54238 | -1.21935 | -0.10723 | C       | -1.53747 | -1.21914 | -0.123   |
| C       | -1.885   | 0.157512 | -0.09079 | C       | -1.87927 | 0.160176 | -0.08143 |
| C       | -3.25751 | 0.531412 | -0.1637  | C       | -3.25233 | 0.537586 | -0.15474 |
| O       | -0.25919 | -1.66102 | -0.02484 | O       | -0.25605 | -1.66083 | -0.04184 |
| C       | 0.781576 | -0.7587  | 0.398447 | C       | 0.786417 | -0.75471 | 0.391053 |
| C       | 0.583013 | 0.626246 | -0.22963 | C       | 0.591087 | 0.628849 | -0.23585 |
| C       | -0.84367 | 1.151475 | -0.03564 | C       | -0.83278 | 1.155909 | -0.03314 |
| C       | 2.131968 | -1.3545  | -0.0952  | C       | 2.135739 | -1.35413 | -0.09077 |
| C       | 3.260604 | -0.32764 | 0.018644 | C       | 3.265942 | -0.3317  | 0.037943 |
| C       | 3.030654 | 0.984489 | 0.163291 | C       | 3.03745  | 0.981313 | 0.177021 |
| C       | 1.664686 | 1.610152 | 0.256607 | C       | 1.672979 | 1.610912 | 0.256046 |
| O       | -1.05266 | 2.380358 | 0.021037 | O       | -1.04659 | 2.381895 | 0.028389 |
| O       | -3.62726 | 1.822037 | -0.13306 | O       | -3.6198  | 1.826749 | -0.11036 |
| O       | 1.643478 | 2.75707  | -0.6023  | O       | 1.66143  | 2.754677 | -0.60809 |
| C       | 4.647077 | -0.90002 | -0.10682 | C       | 4.652308 | -0.90818 | -0.06701 |
| O       | 2.063305 | -1.88616 | -1.40365 | O       | 2.077467 | -1.88    | -1.40346 |
| C       | 0.810899 | -0.73768 | 1.938124 | C       | 0.787057 | -0.72691 | 1.936937 |

|   |          |          |          |   |          |          |          |
|---|----------|----------|----------|---|----------|----------|----------|
| O | 0.711446 | 0.498817 | -1.65946 | O | 0.714423 | 0.508522 | -1.66569 |
| O | -0.21896 | 0.105471 | 2.437997 | O | -0.2115  | 0.093128 | 2.526701 |
| H | -5.28385 | -0.14661 | -0.33959 | H | -5.27934 | -0.13632 | -0.33795 |
| H | -4.63646 | -2.55283 | -0.40815 | H | -4.63611 | -2.542   | -0.43527 |
| H | -2.24477 | -3.237   | -0.24545 | H | -2.24543 | -3.23329 | -0.28697 |
| H | 2.371528 | -2.21408 | 0.54588  | H | 2.365661 | -2.21747 | 0.548511 |
| H | 3.859728 | 1.688987 | 0.200998 | H | 3.867635 | 1.683643 | 0.226016 |
| H | 1.43726  | 1.91707  | 1.28718  | H | 1.439807 | 1.923771 | 1.283547 |
| H | -2.80418 | 2.363553 | -0.04706 | H | -2.79581 | 2.368781 | -0.02925 |
| H | 0.771547 | 3.169408 | -0.43534 | H | 0.801988 | 3.187311 | -0.43338 |
| H | 5.410064 | -0.1161  | -0.12458 | H | 5.417352 | -0.12624 | -0.0799  |
| H | 4.872839 | -1.58067 | 0.725934 | H | 4.865623 | -1.58368 | 0.773038 |
| H | 4.724951 | -1.4897  | -1.02753 | H | 4.740146 | -1.50365 | -0.9831  |
| H | 1.687149 | -1.16978 | -1.94961 | H | 1.711236 | -1.15953 | -1.95059 |
| H | 0.674738 | -1.77739 | 2.267296 | H | 0.706858 | -1.76895 | 2.276215 |
| H | 1.798283 | -0.39508 | 2.275914 | H | 1.741396 | -0.32988 | 2.291042 |
| H | 1.060379 | 1.373332 | -1.93538 | H | 1.066823 | 1.383337 | -1.93766 |
| H | -0.21796 | 0.053158 | 3.405746 | H | -1.07249 | -0.3391  | 2.414987 |
